# Supplementary material for: Palladium-catalyzed regioselective C–H bond arylations at the C3 position of ortho-substituted fluorobenzenes
Source: Royal Society of Chemistry journal article supplement (doi:10.1039/c7ob01689a), 2017-01-01

# Electronic Supplementary Information (ESI)

For Org. Biomol. Chem.

## Palladium-catalyzed regioselective C–H bond arylations at the C3 position of *ortho*-substituted fluorobenzenes

Anoir Hfaiedh,<sup>a, b</sup> Hamed Ben Ammar,<sup>c</sup> Jean-François Soulé,<sup>a\*</sup> and  
Henri Doucet<sup>a\*</sup>

a. UMR 6226 CNRS-Université de Rennes 1 " Organométalliques, Matériaux et Catalyse", Campus de Beaulieu, 35042 Rennes, France. E-mail: jean-francois.soule@univ-rennes1.fr; henri.doucet@univ-rennes1.fr

b. Université de Tunis El Manar, Faculté des Sciences de Tunis, Campus Universitaire El-Manar, 2092 El Manar Tunis, Tunisia.

c. Laboratoire de Synthèse Organique Asymétrique et Catalyse Homogène (UR 11ES56), Université de Monastir, Faculté des Sciences de Monastir, Avenue de l'environnement, Monastir 5000, Tunisia.

Copy of <sup>1</sup>H NMR and <sup>13</sup>C-NMR spectra

1

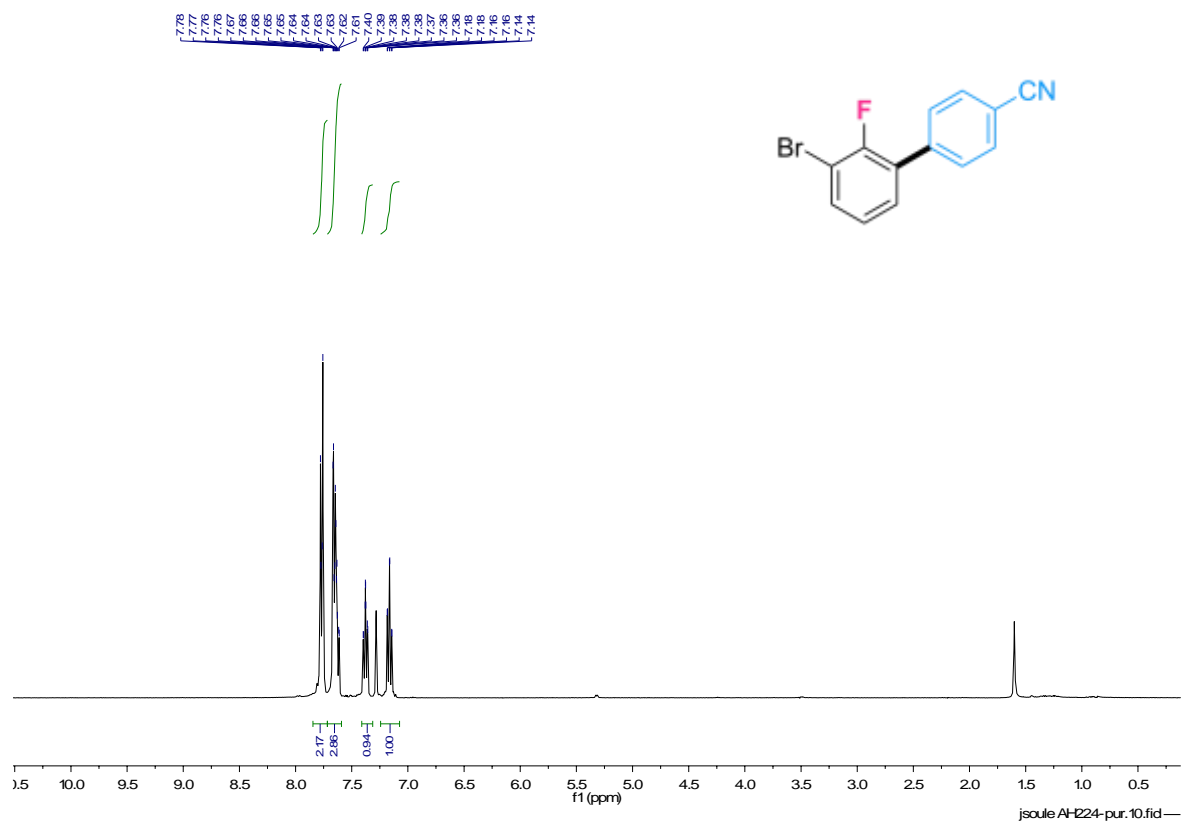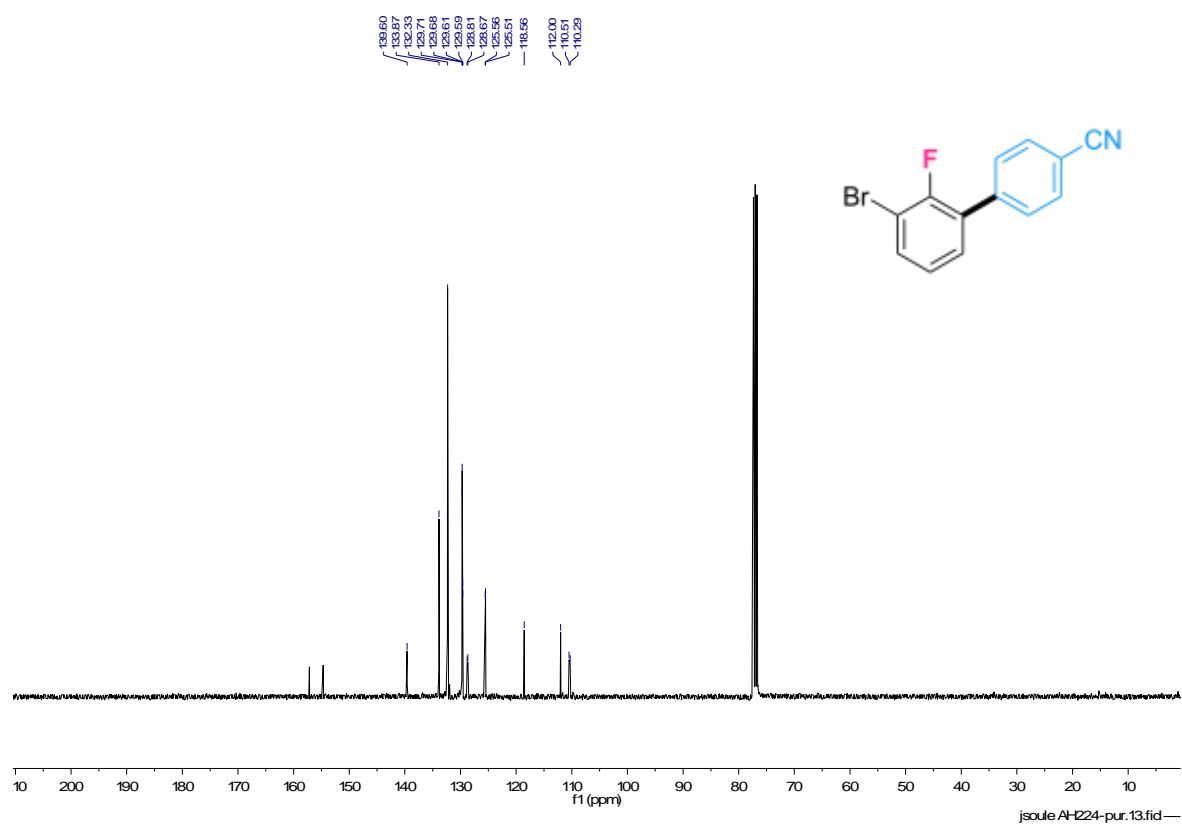

2

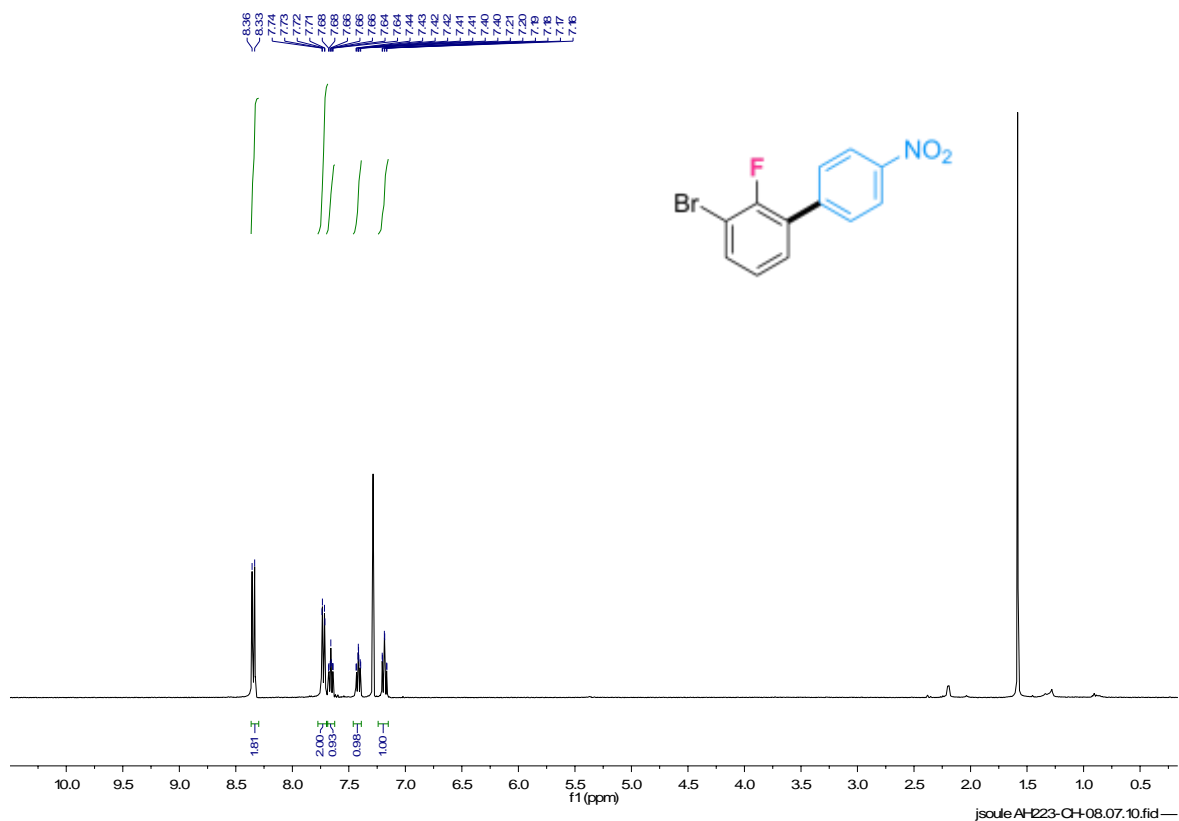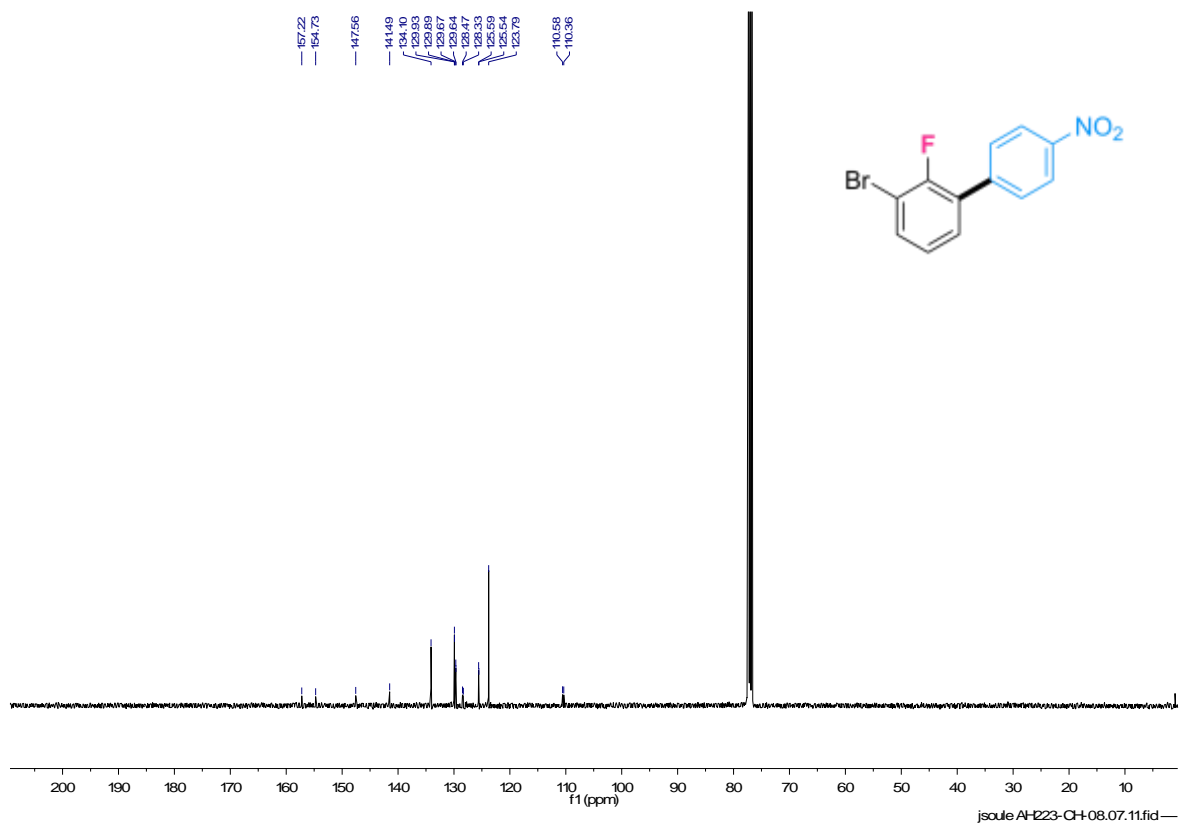

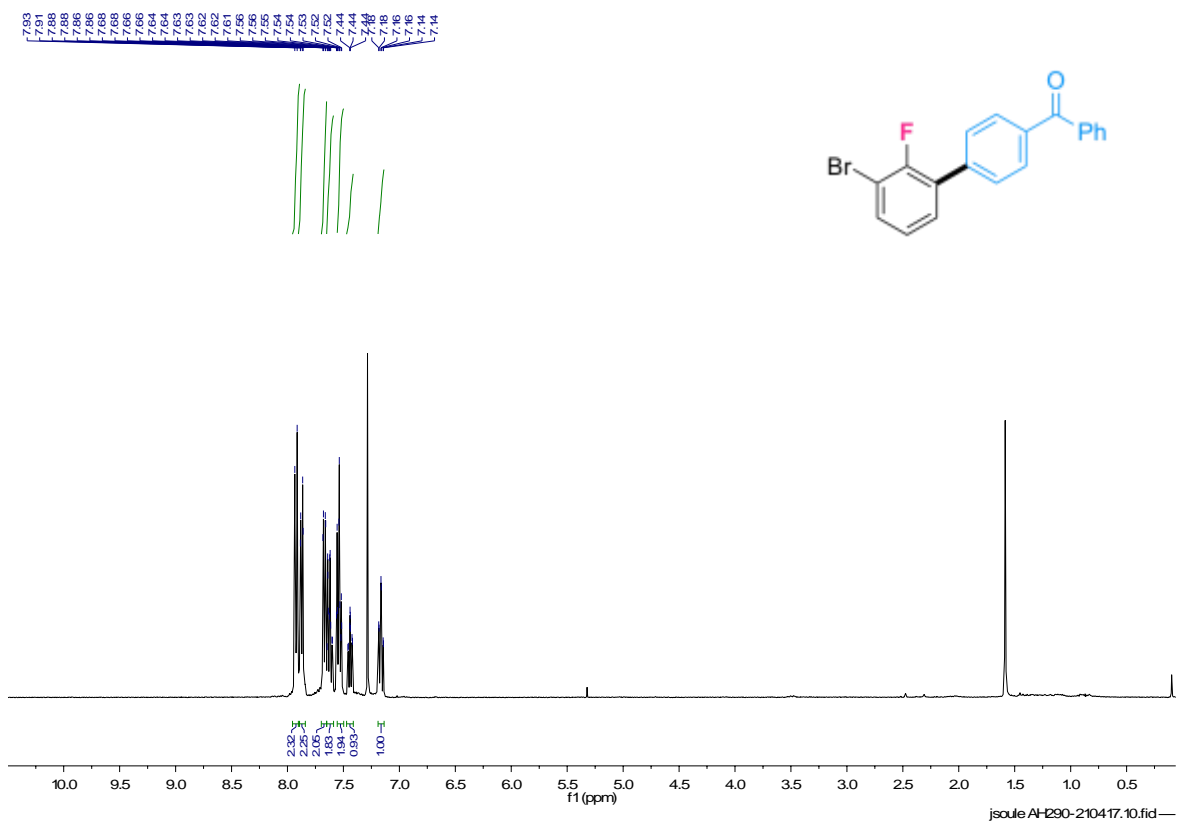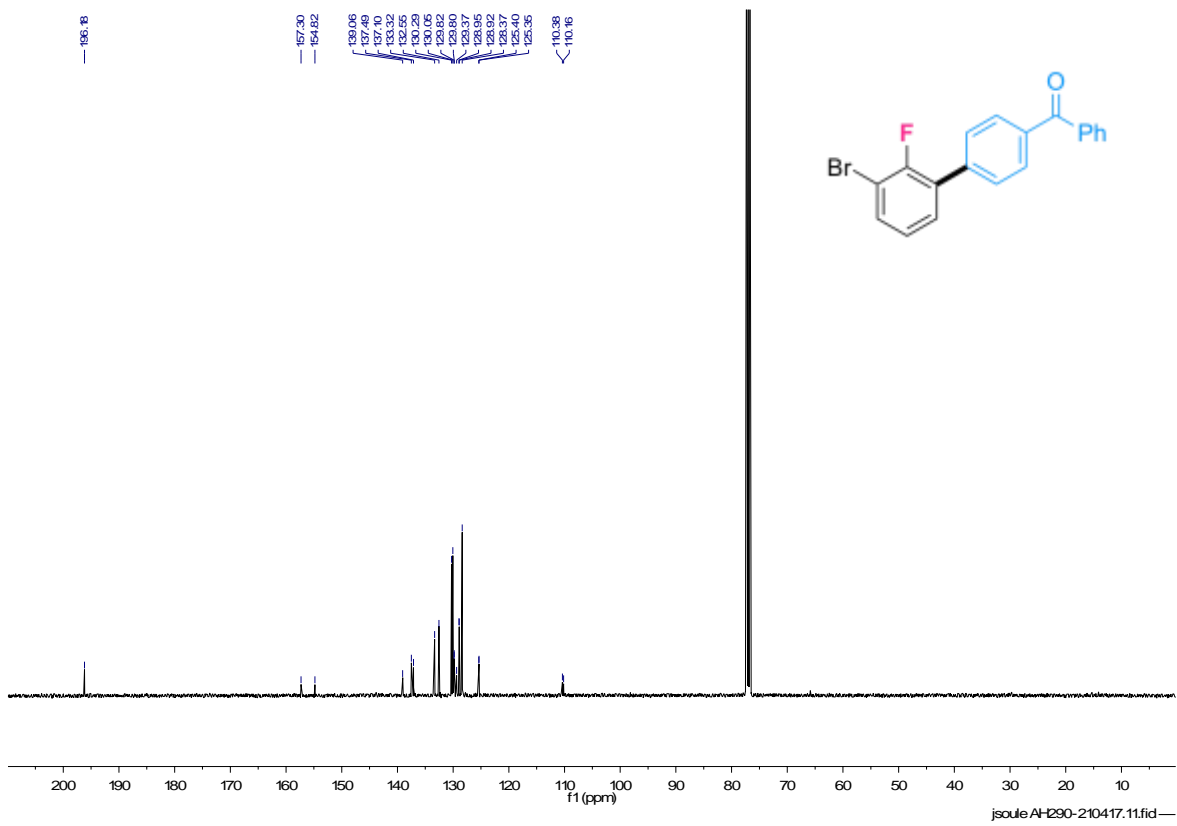

4

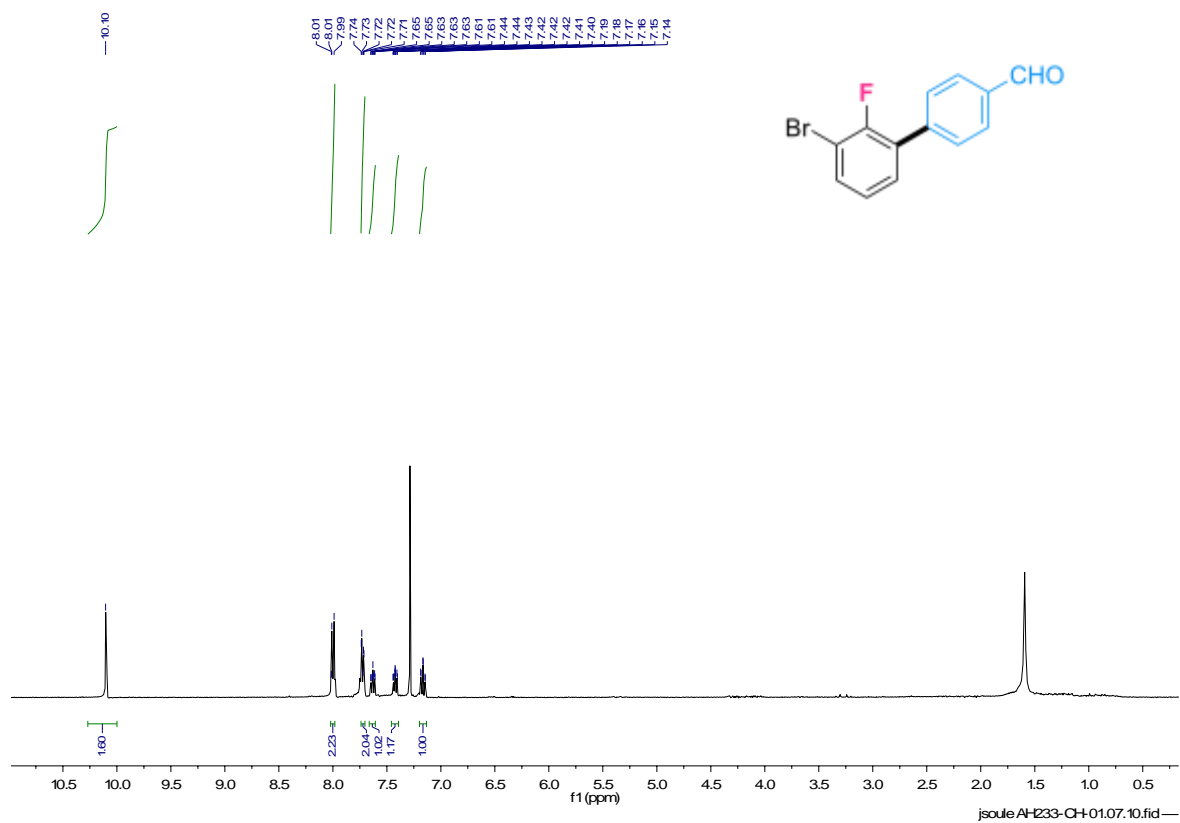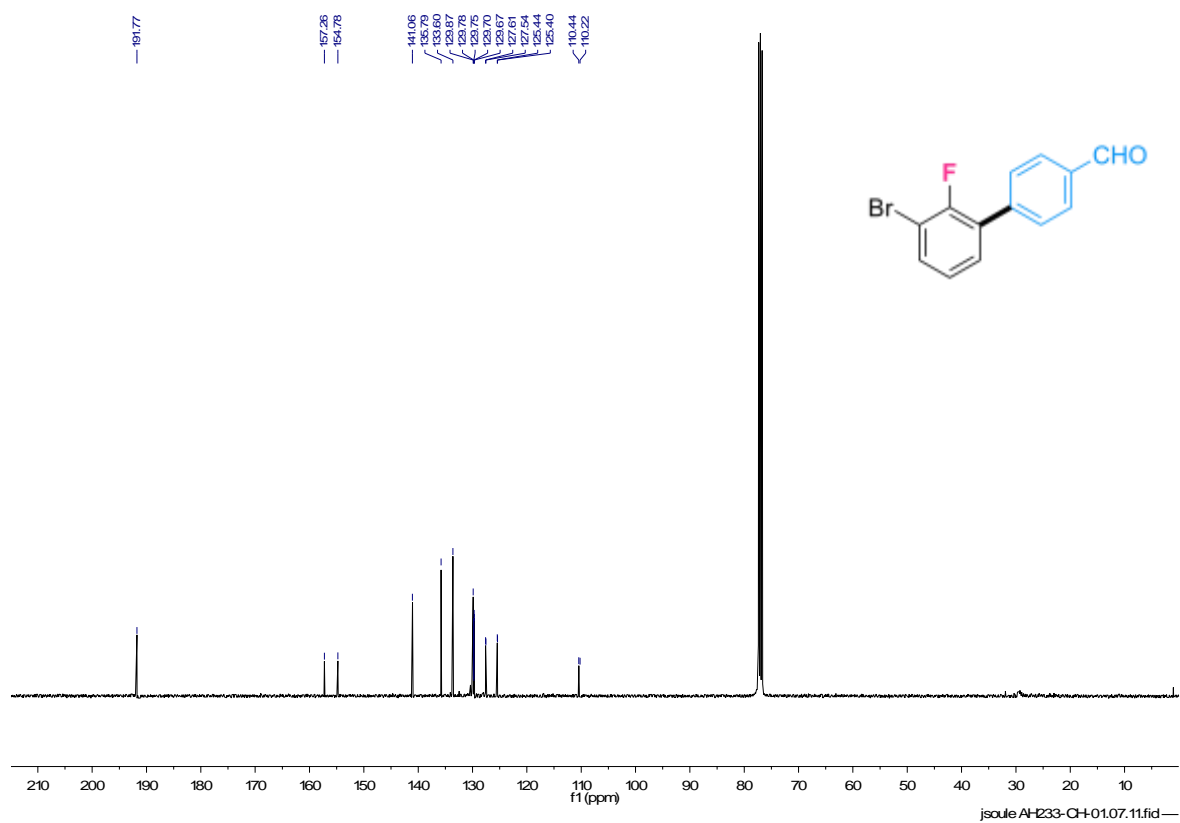

5

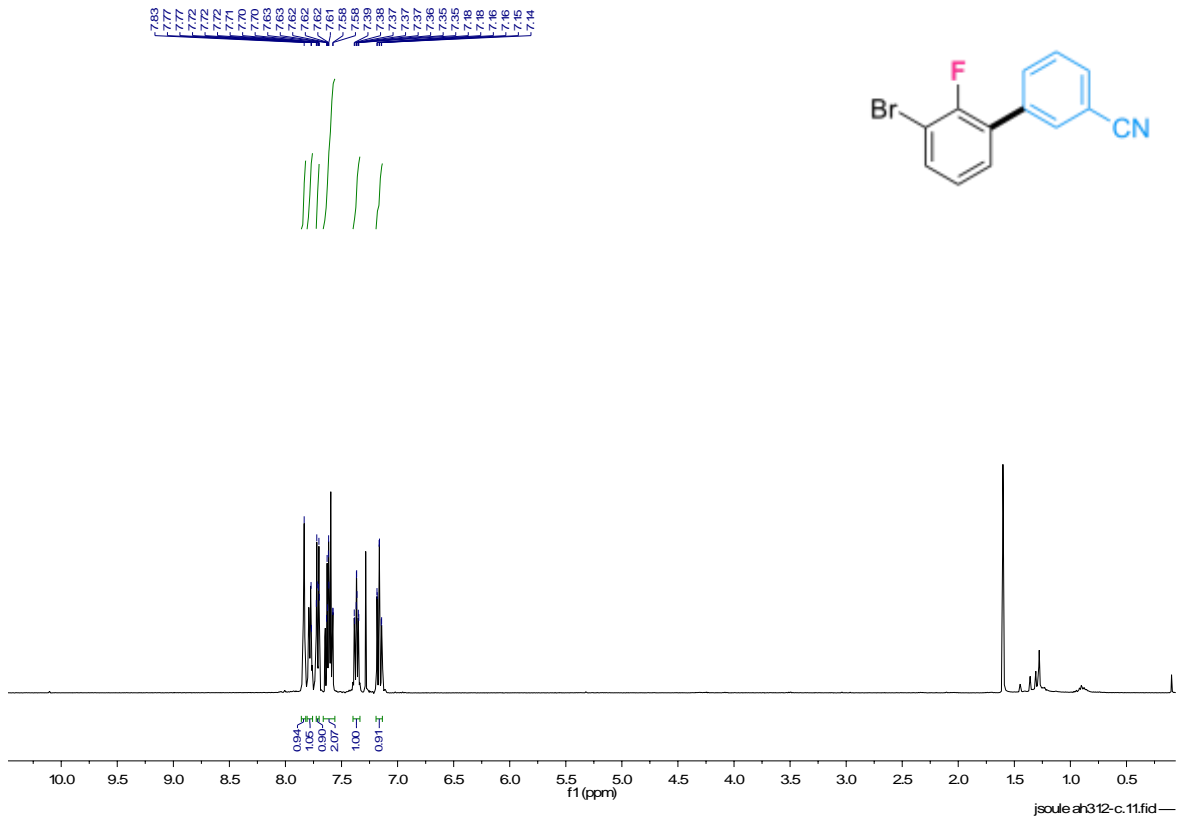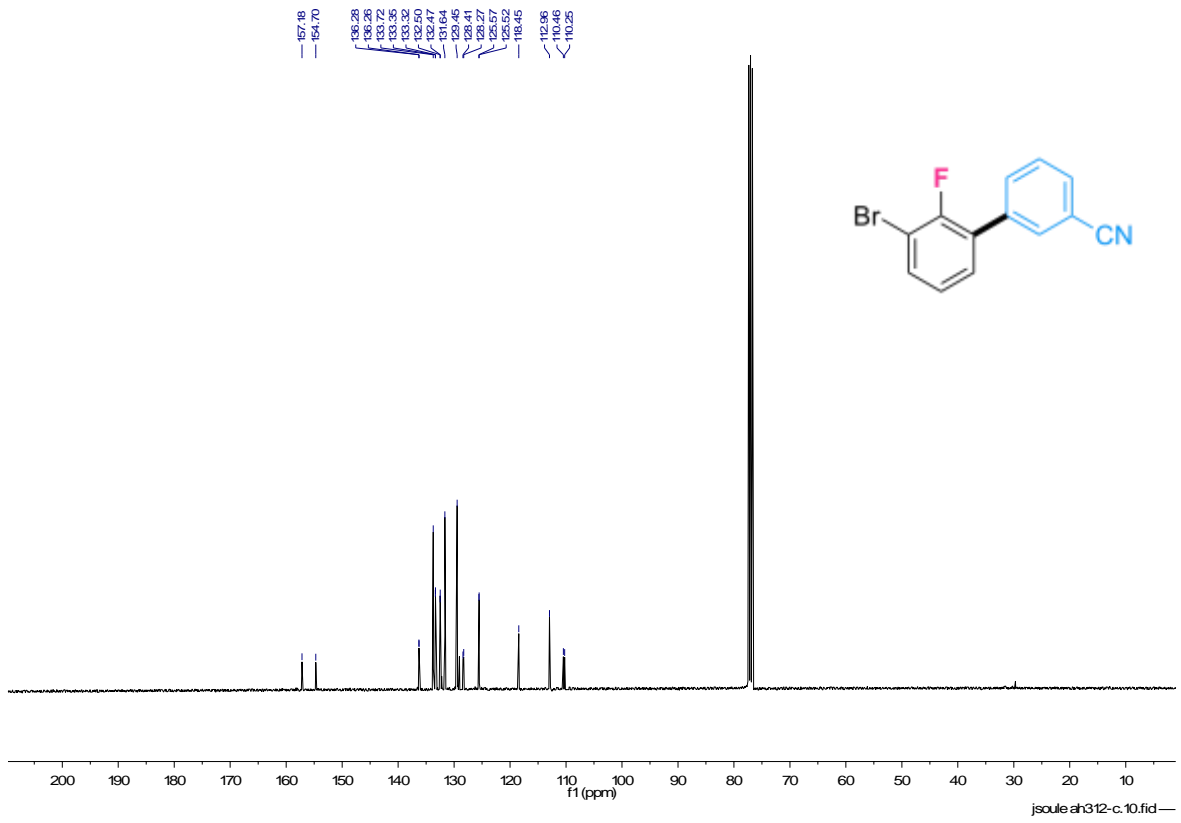

6

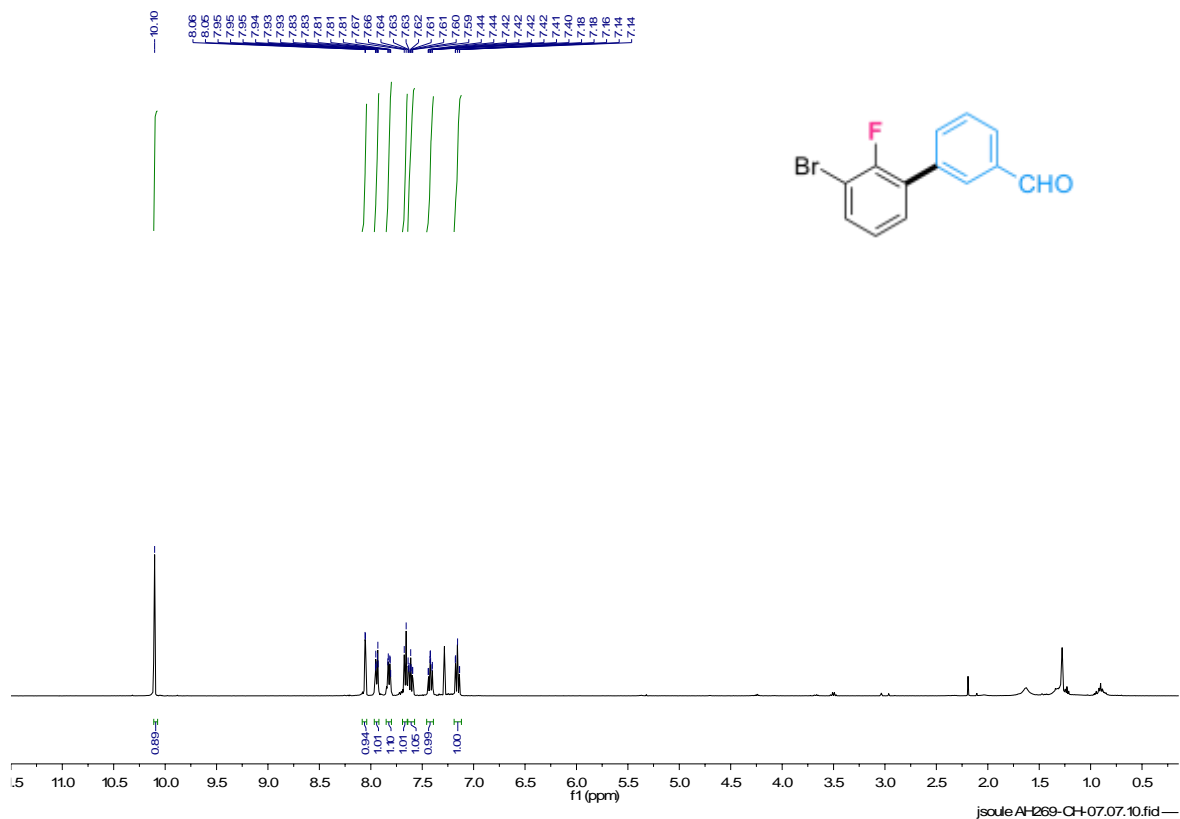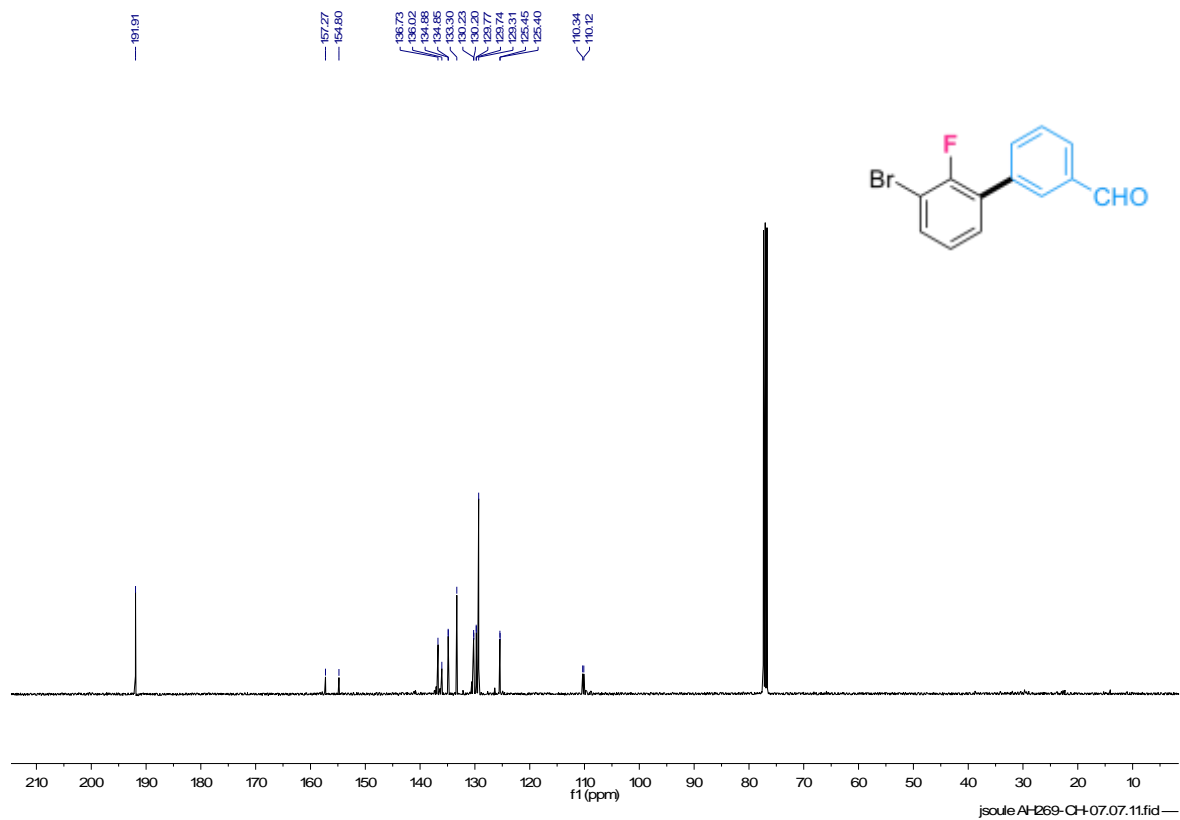

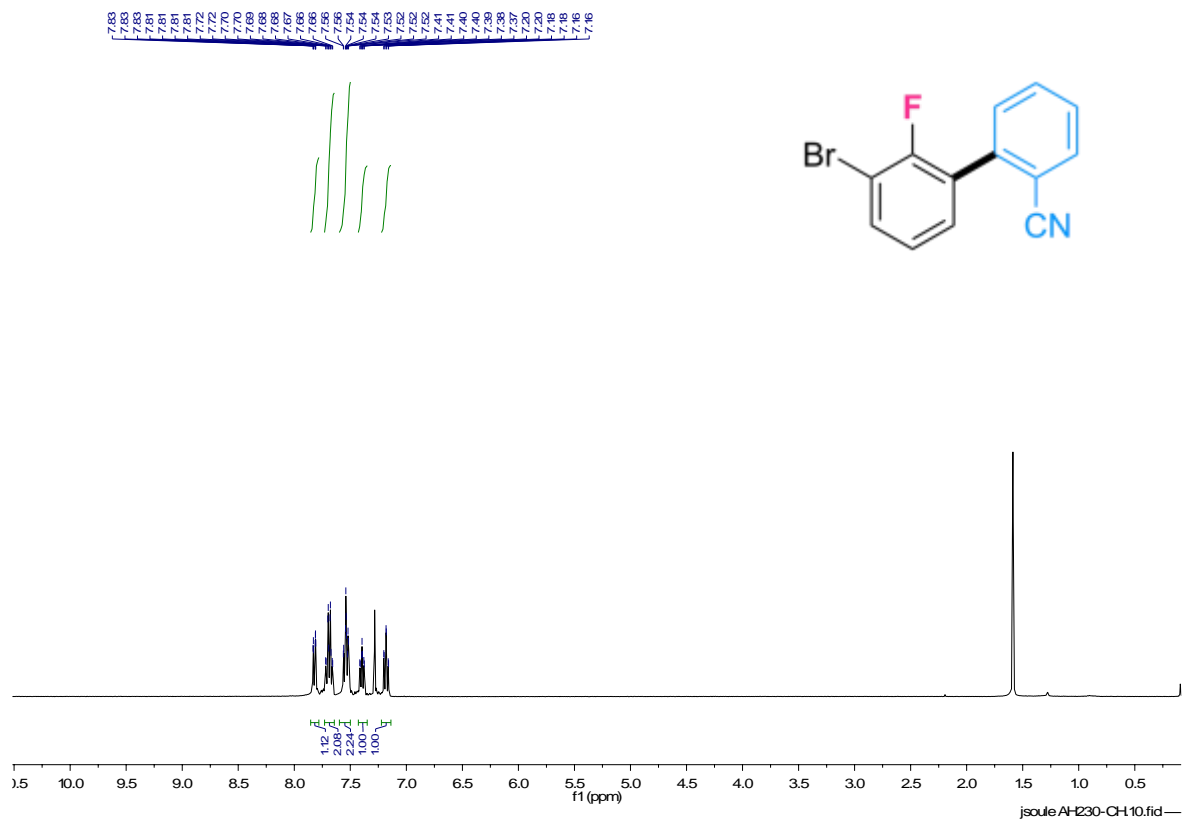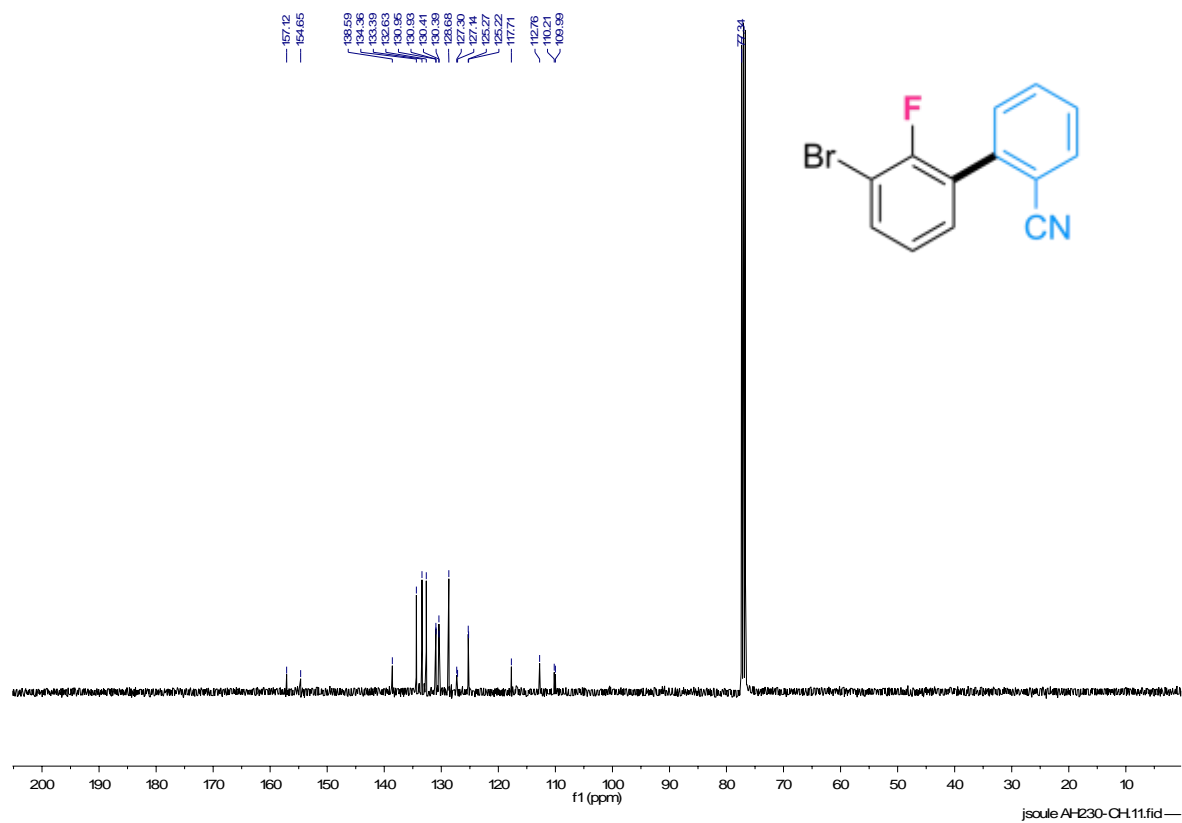



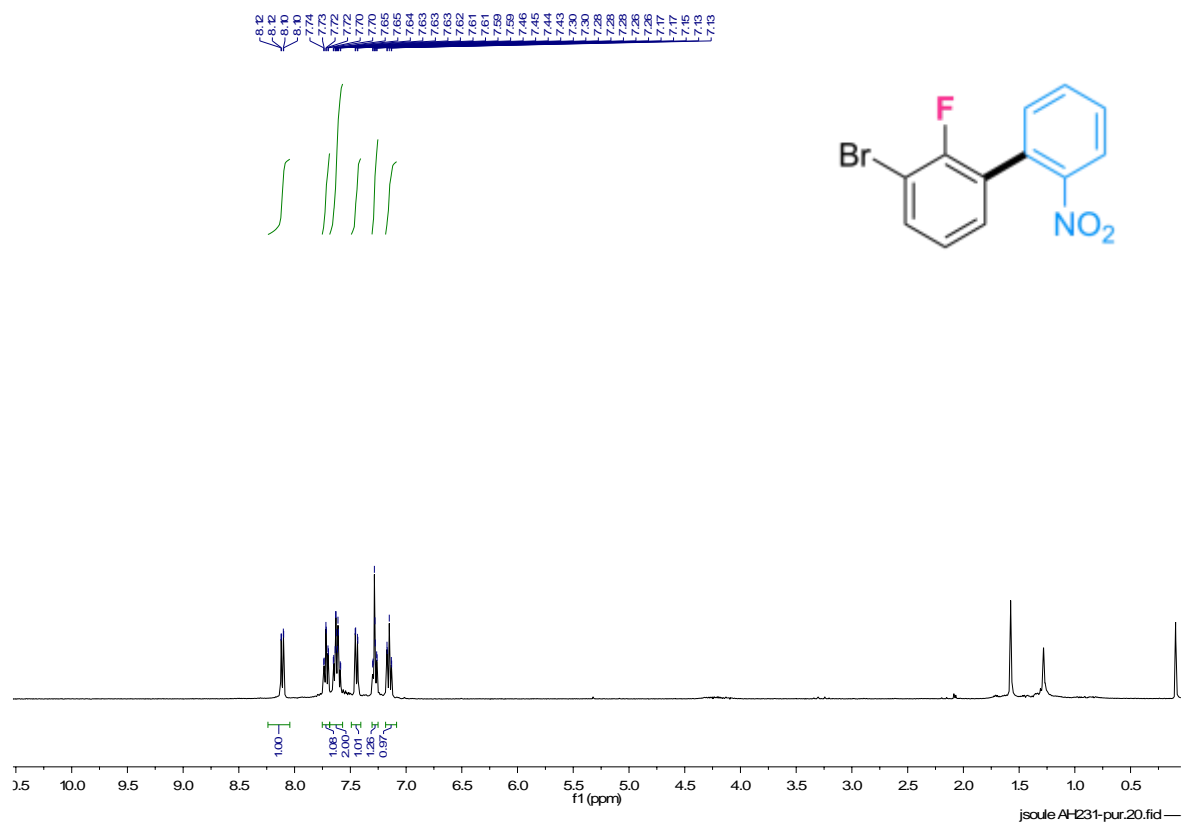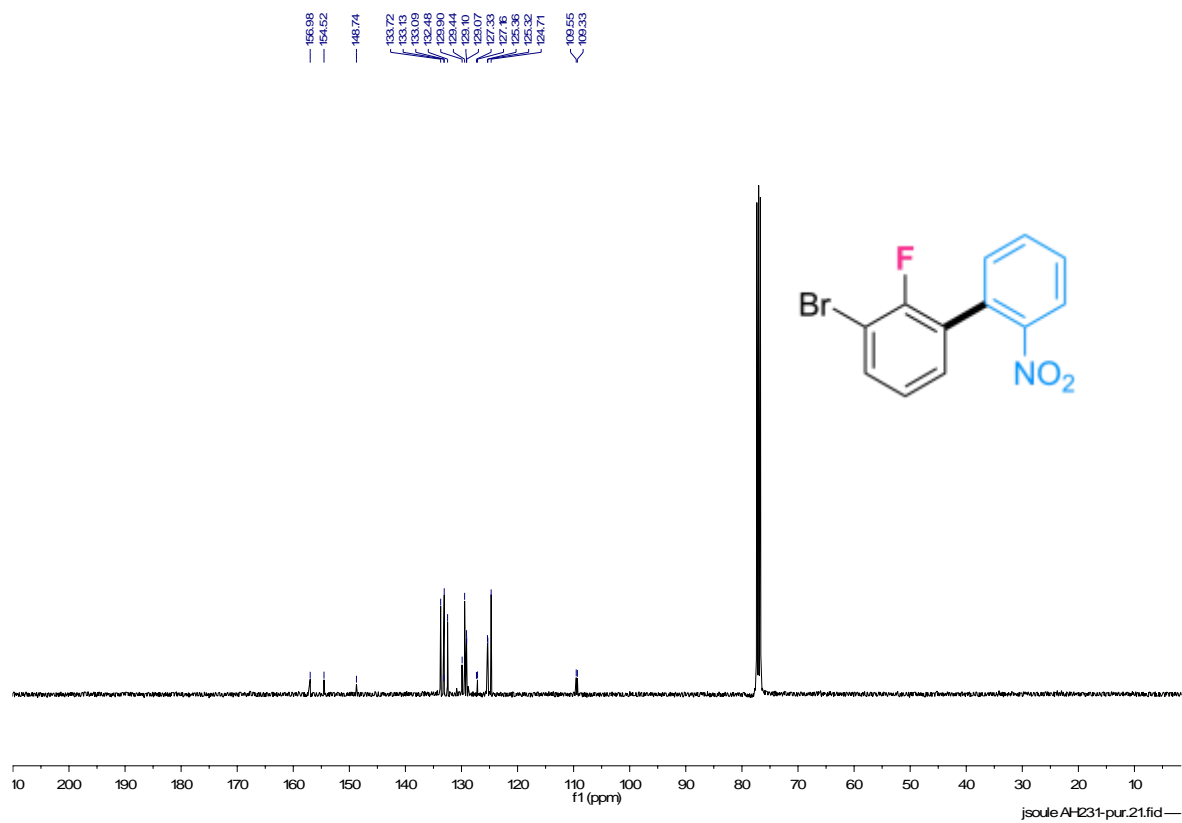

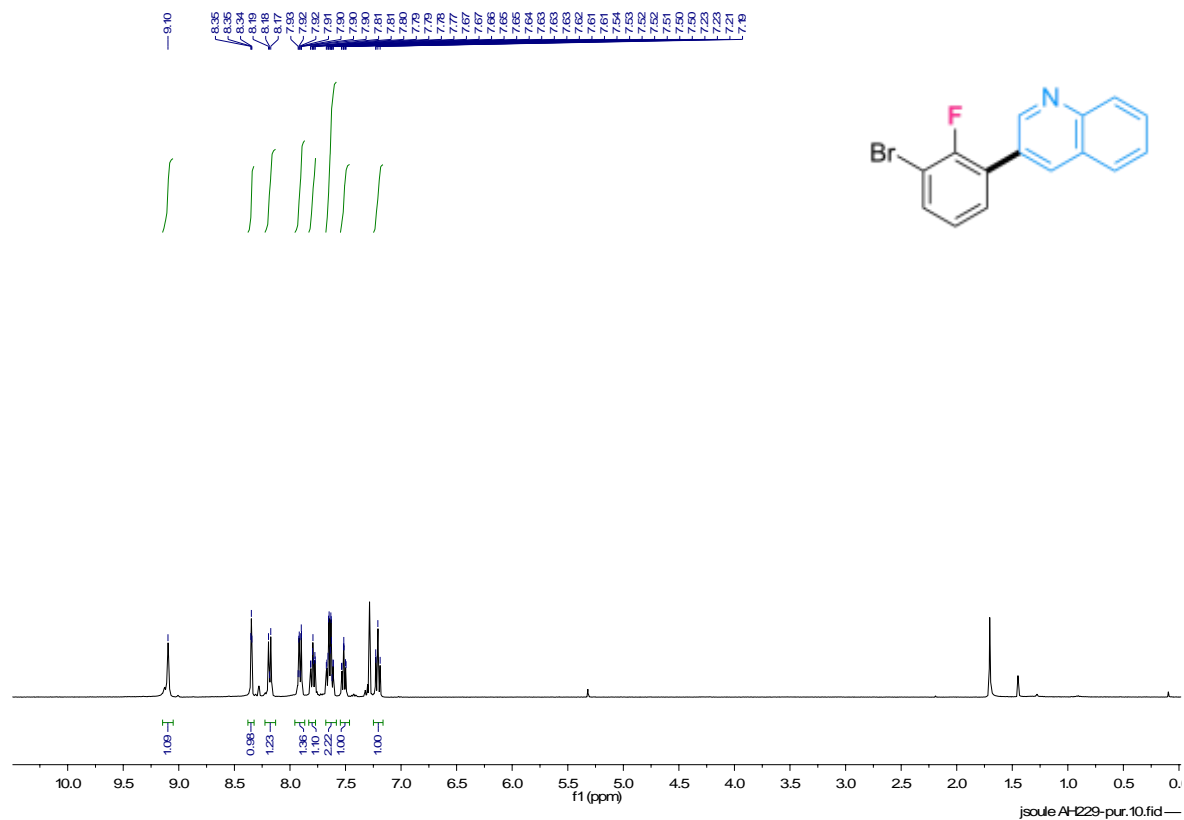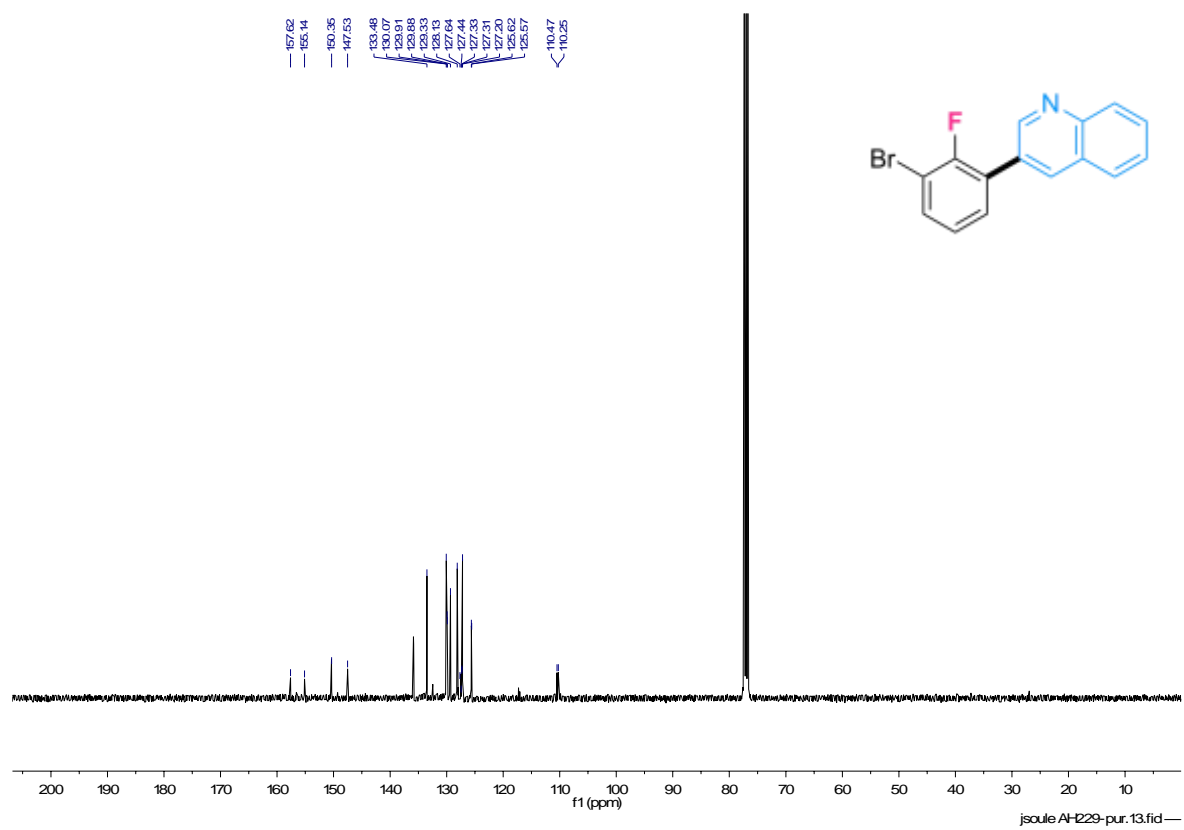

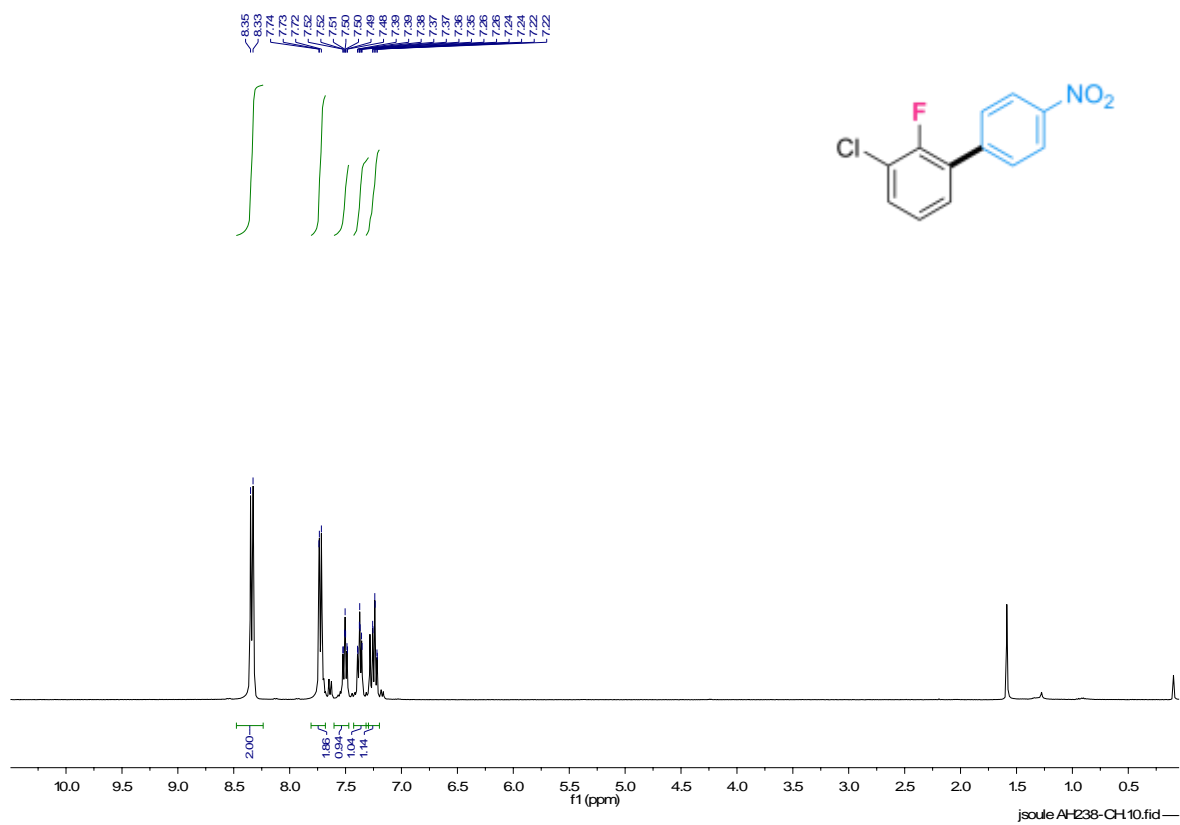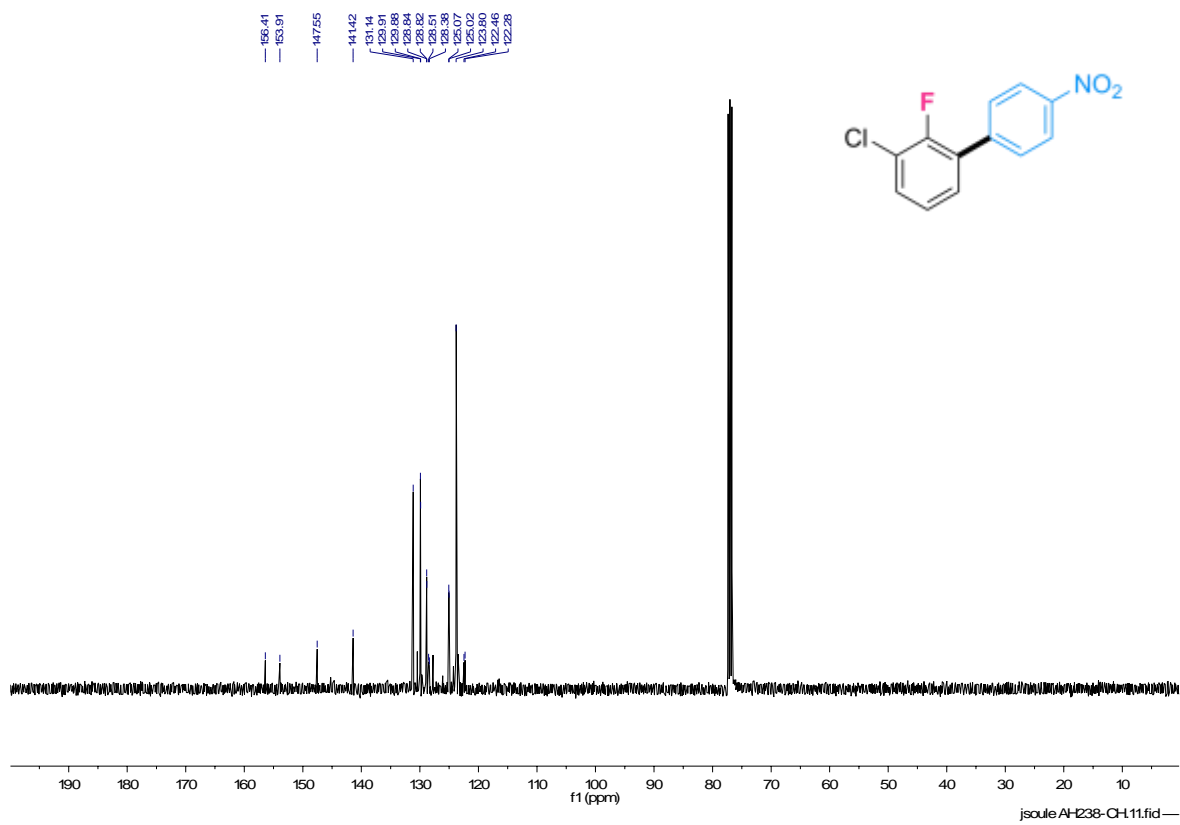

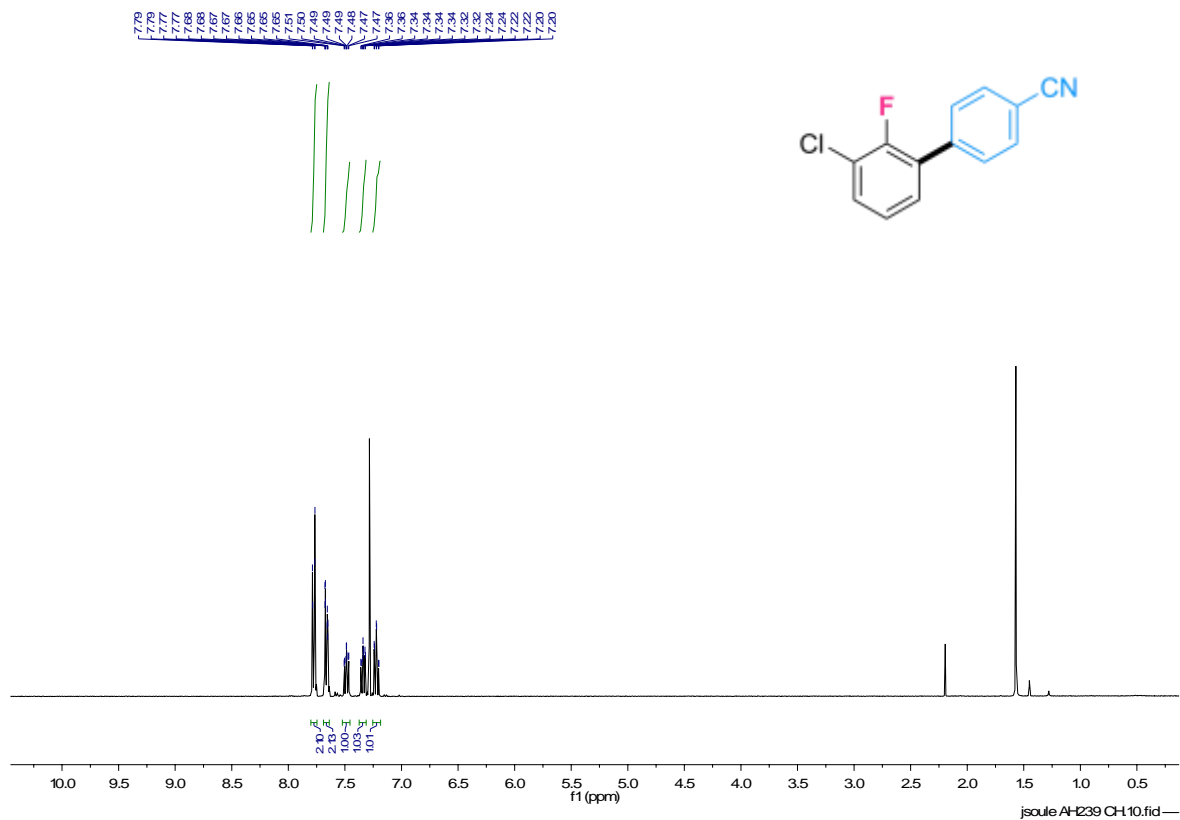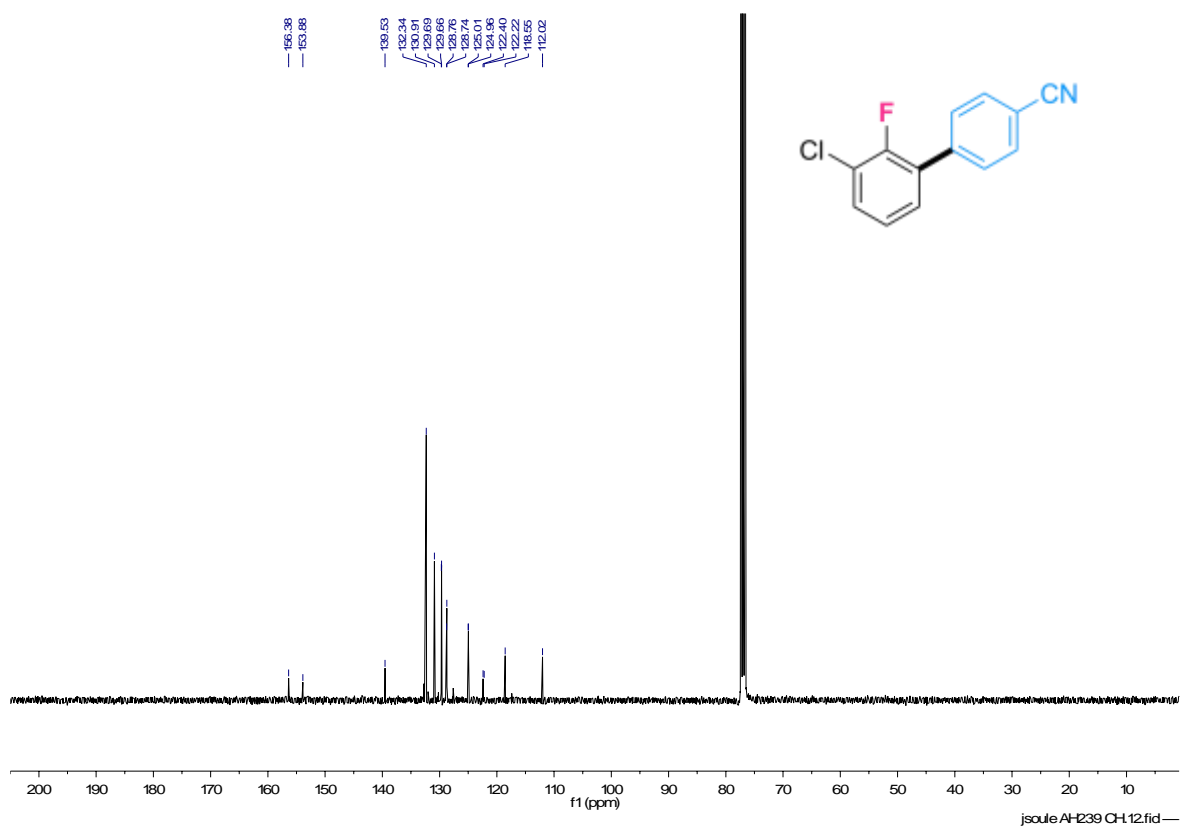

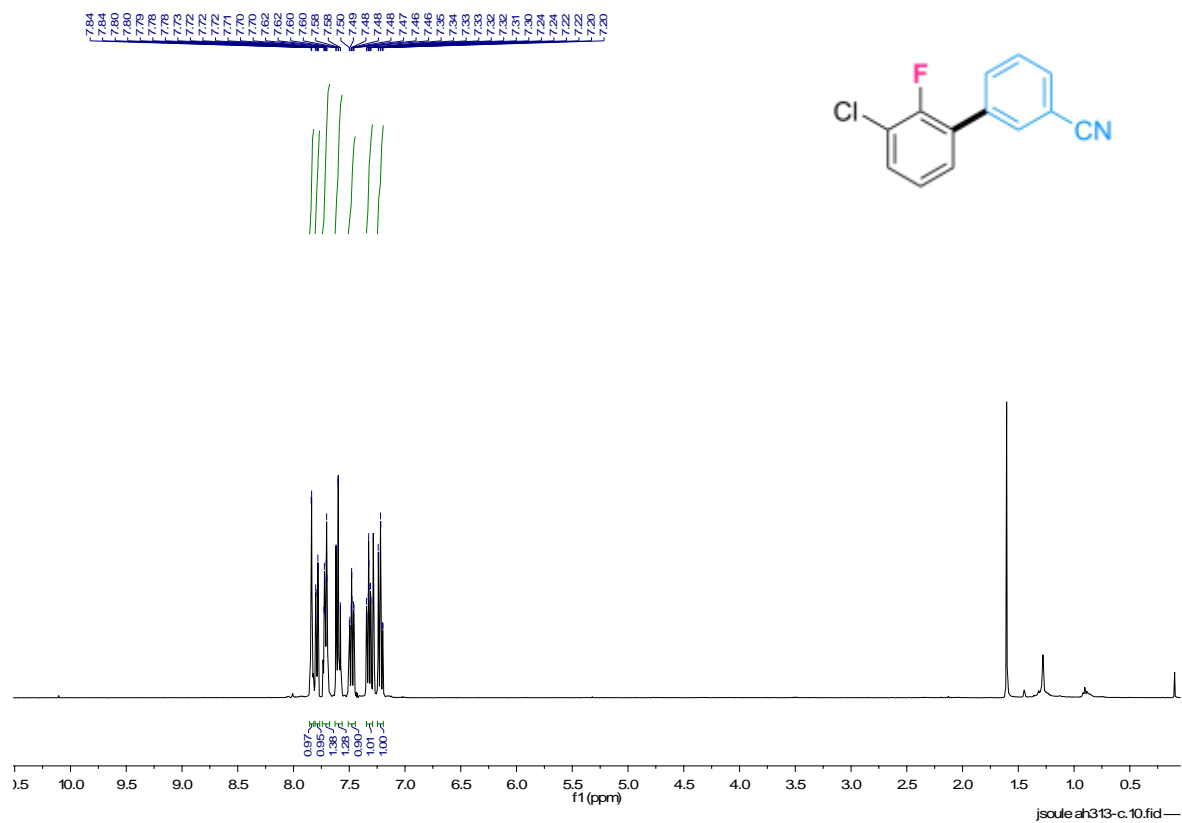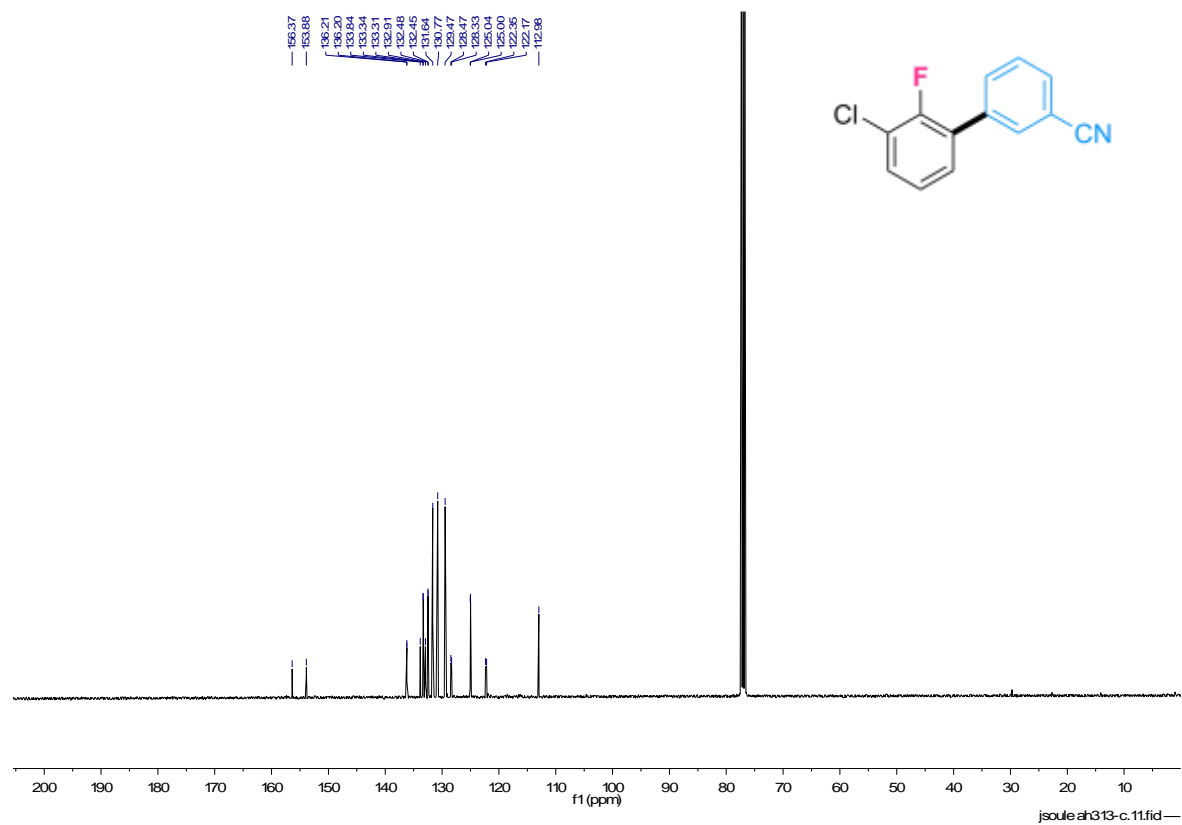

13

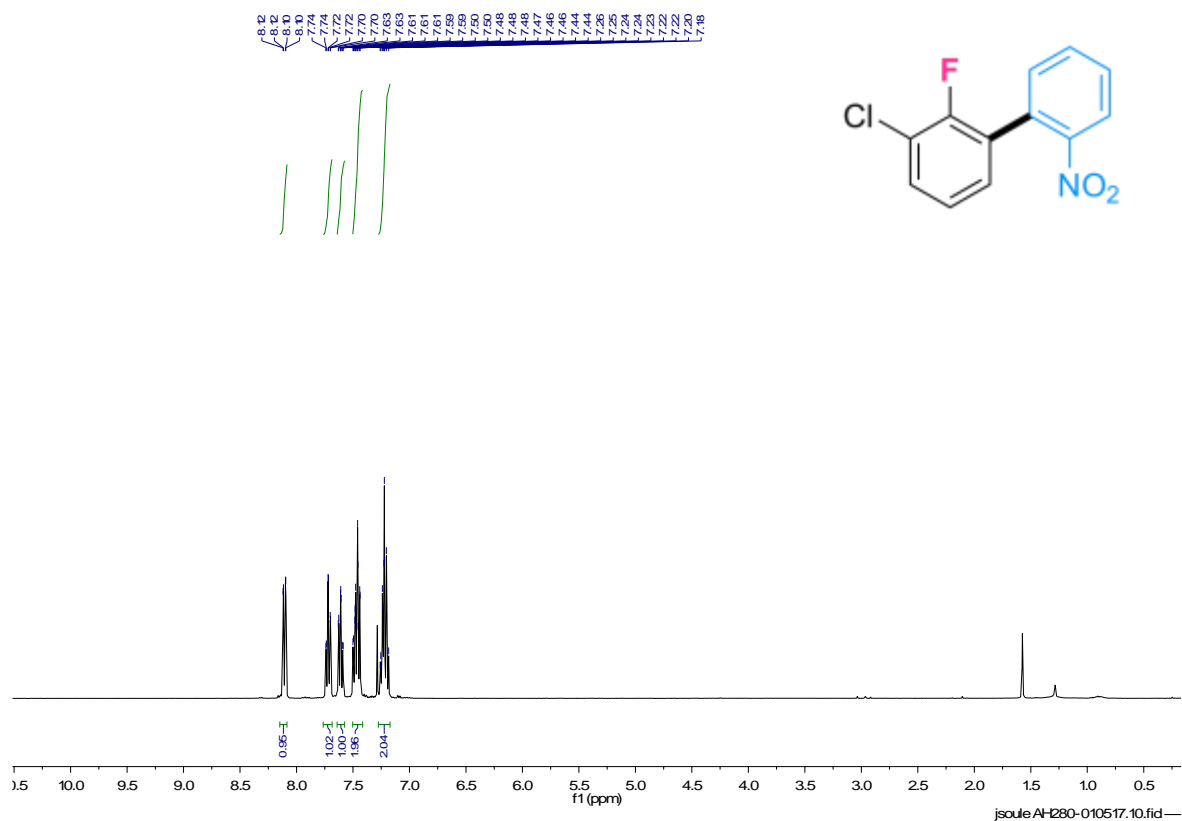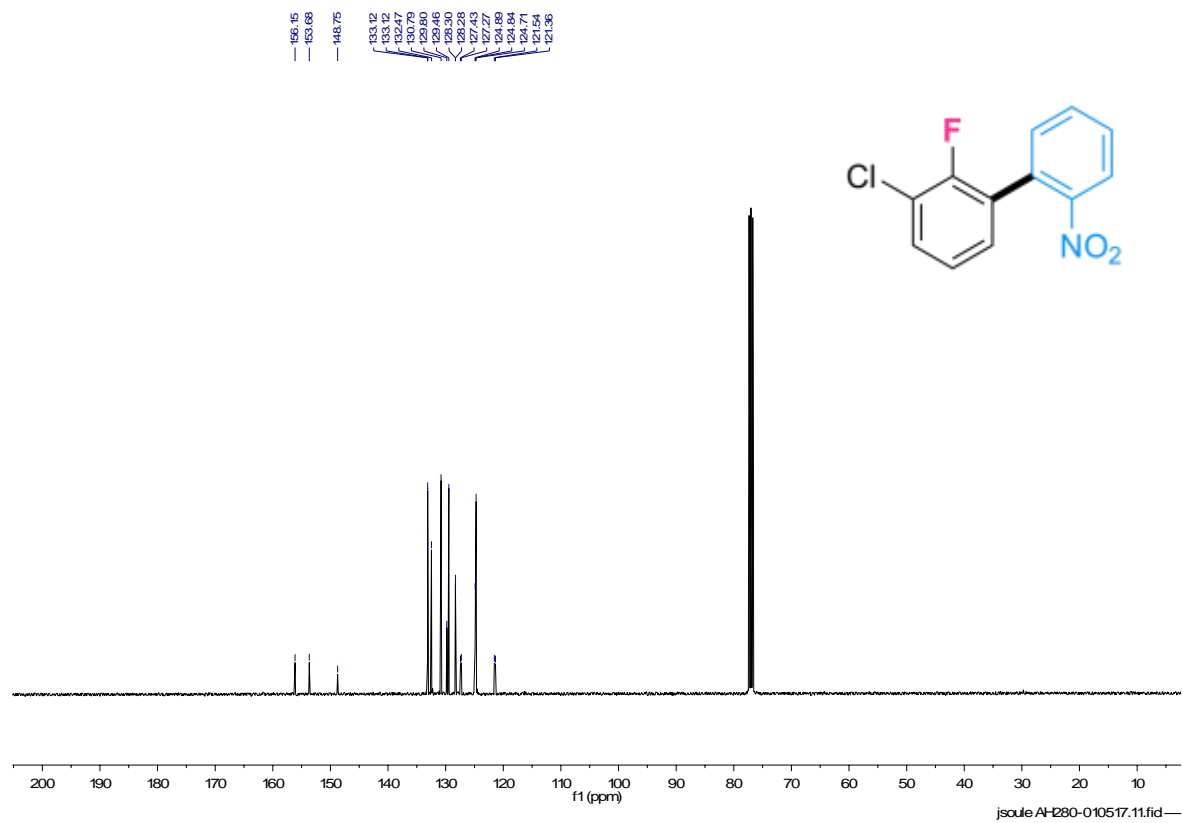

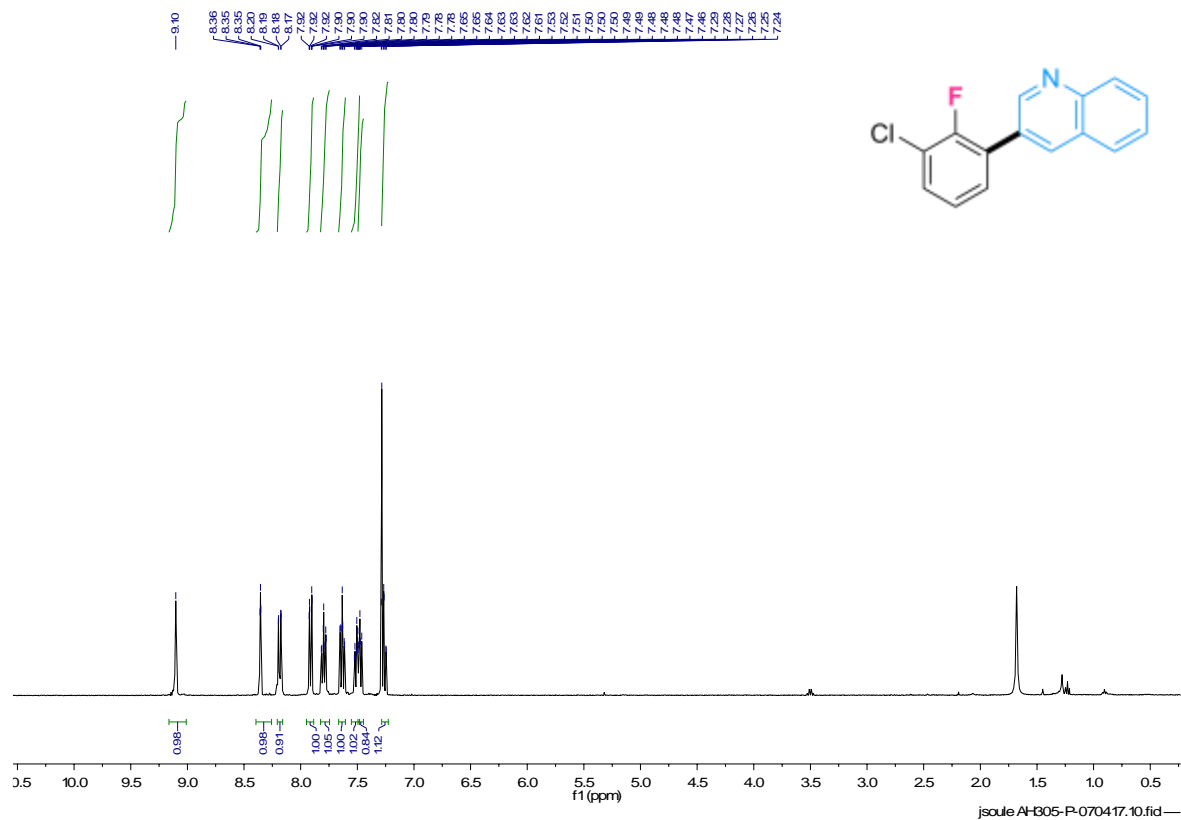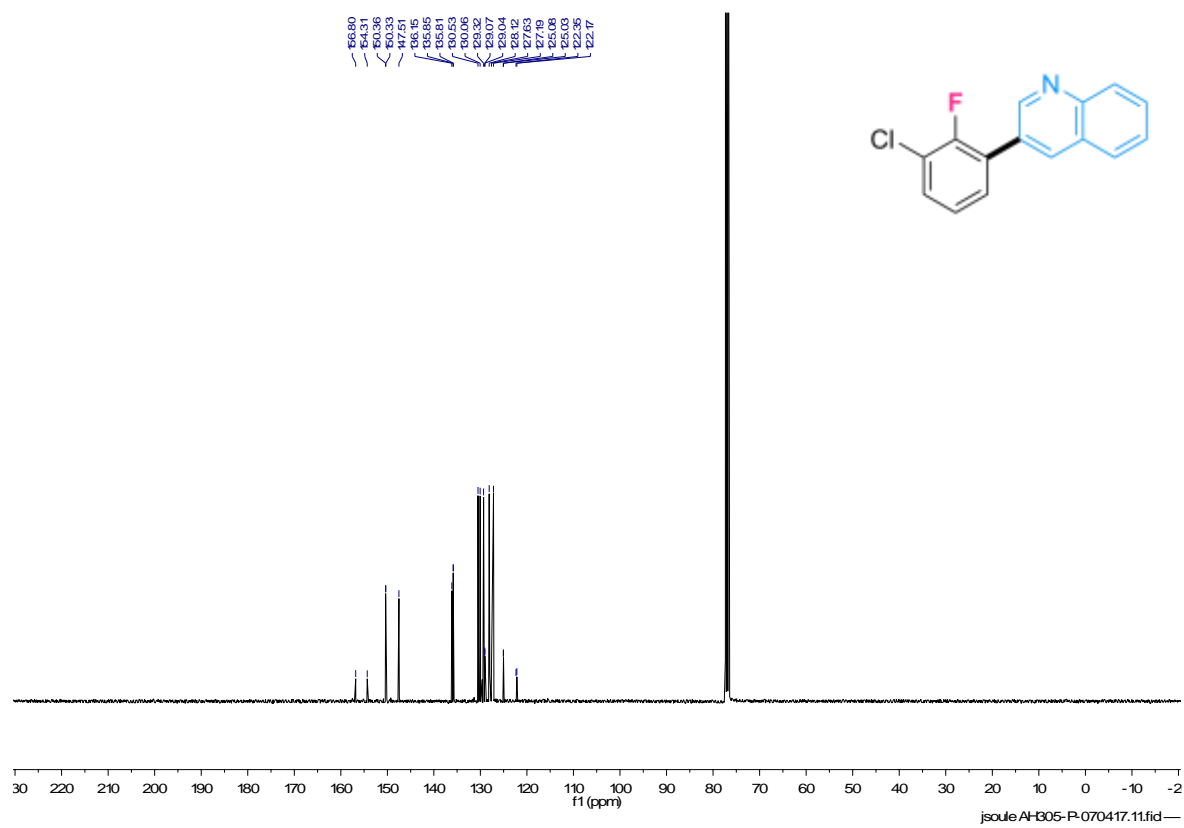

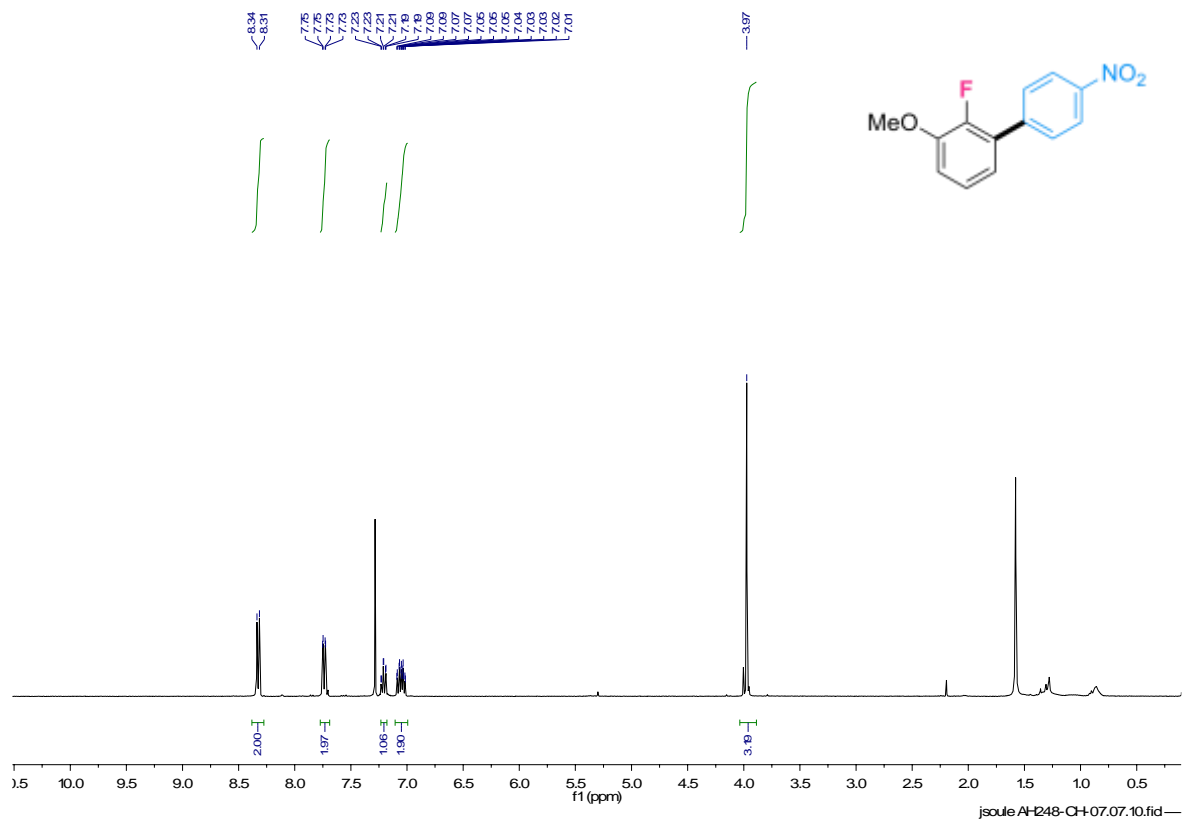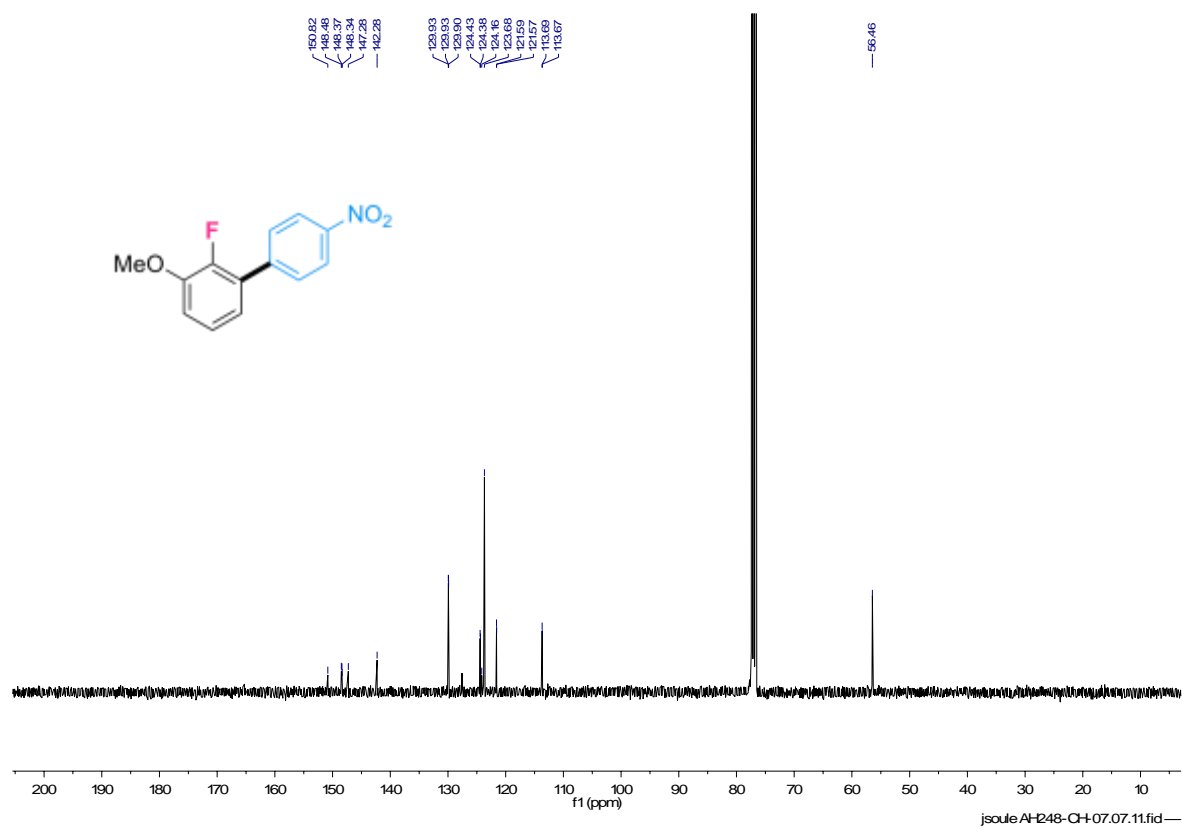



16

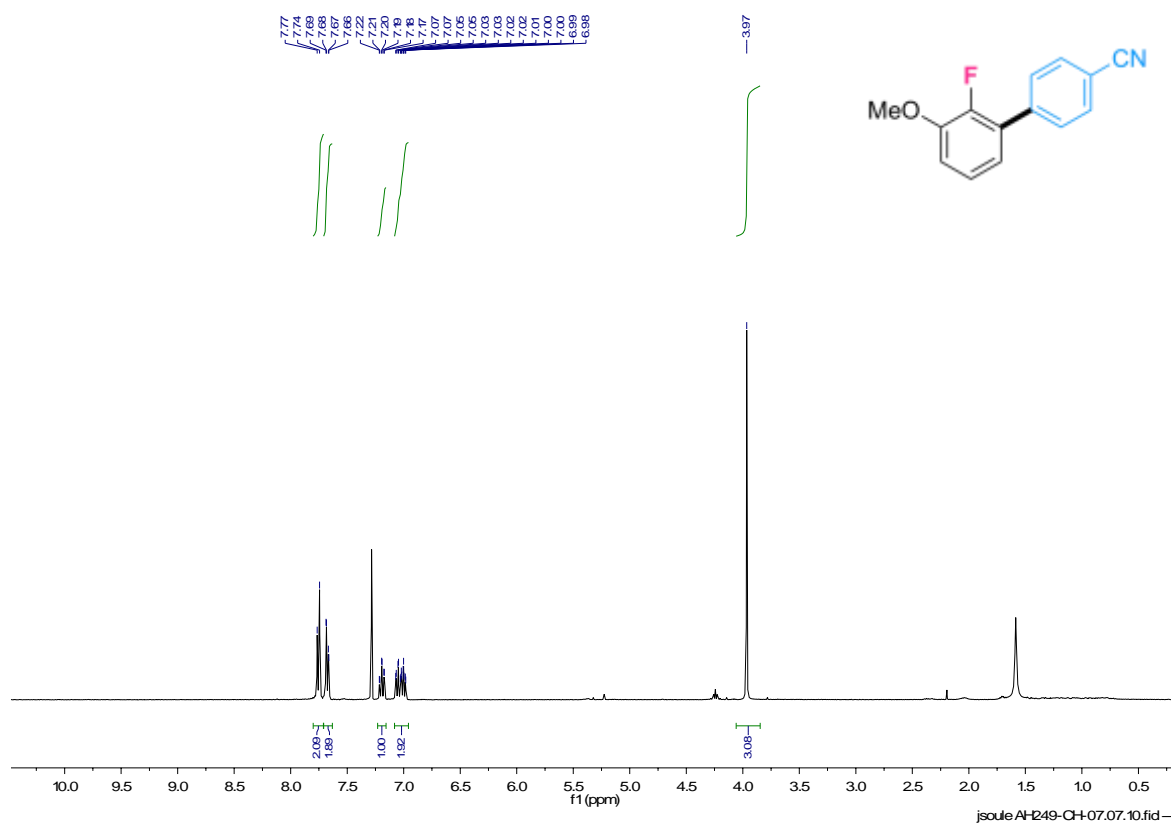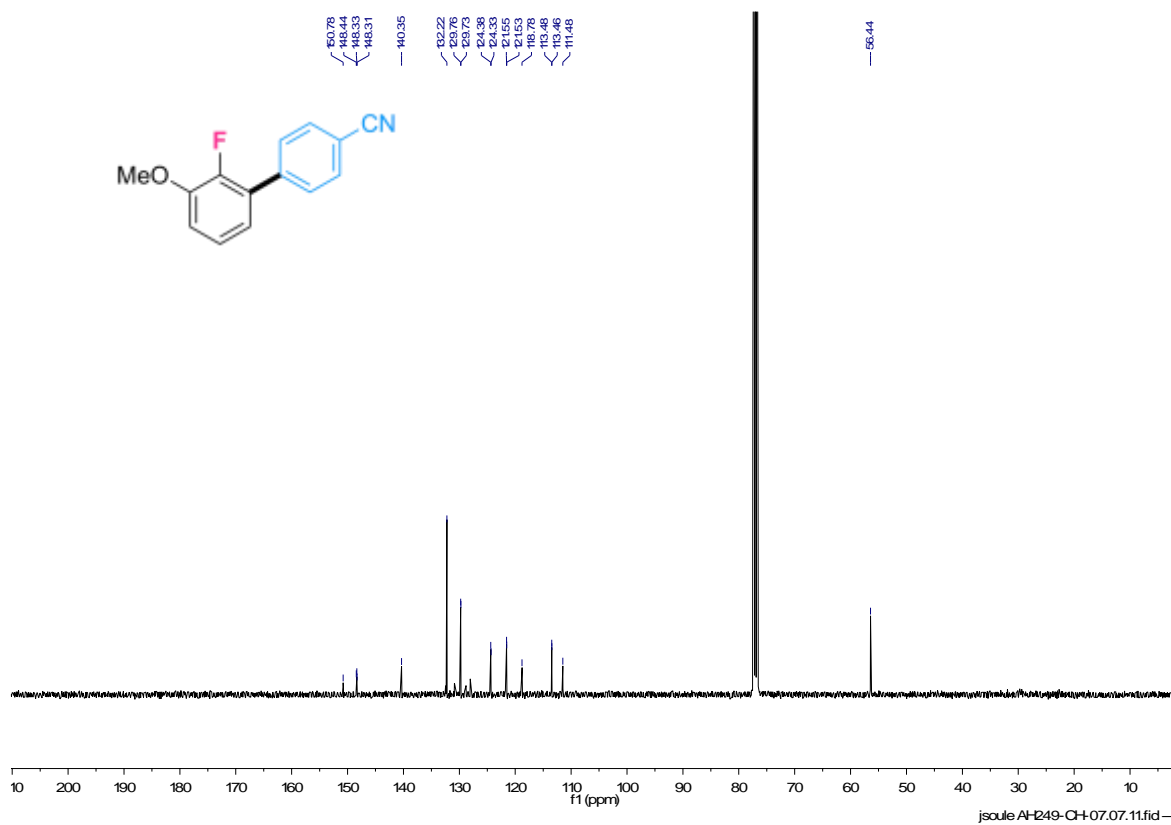

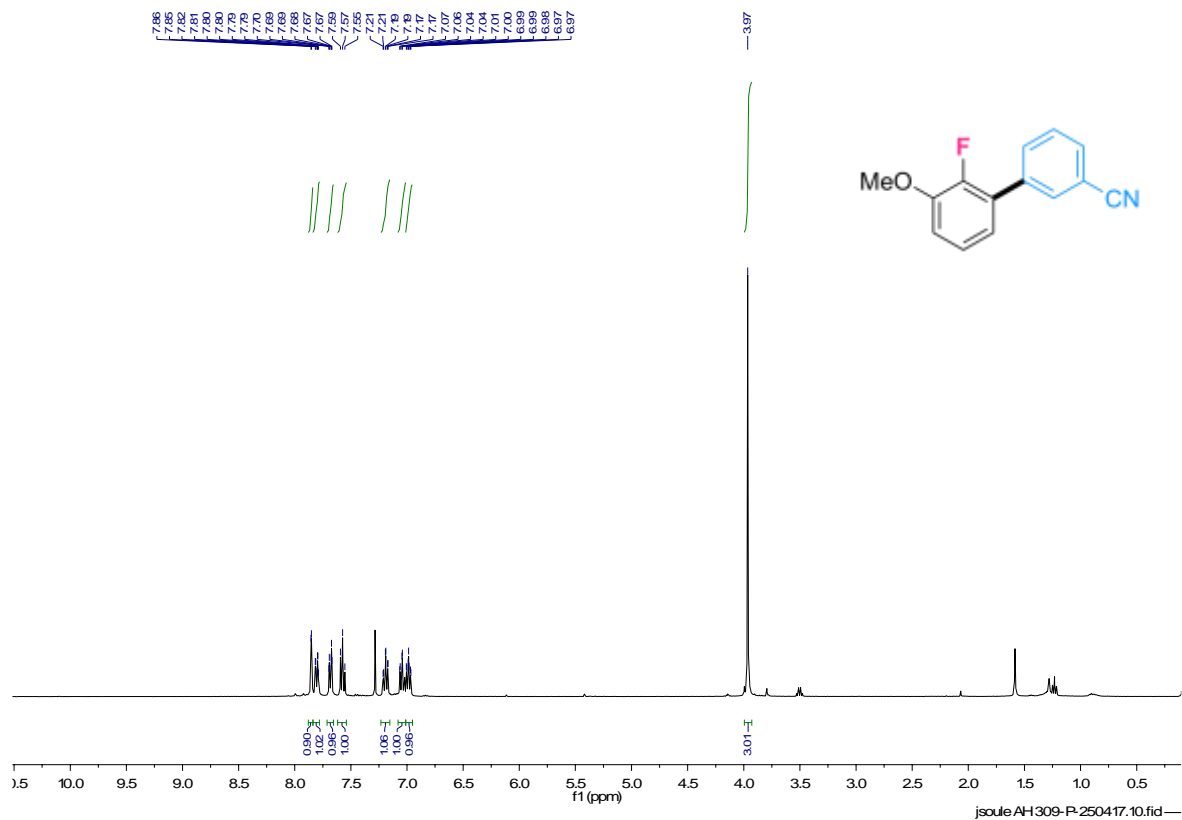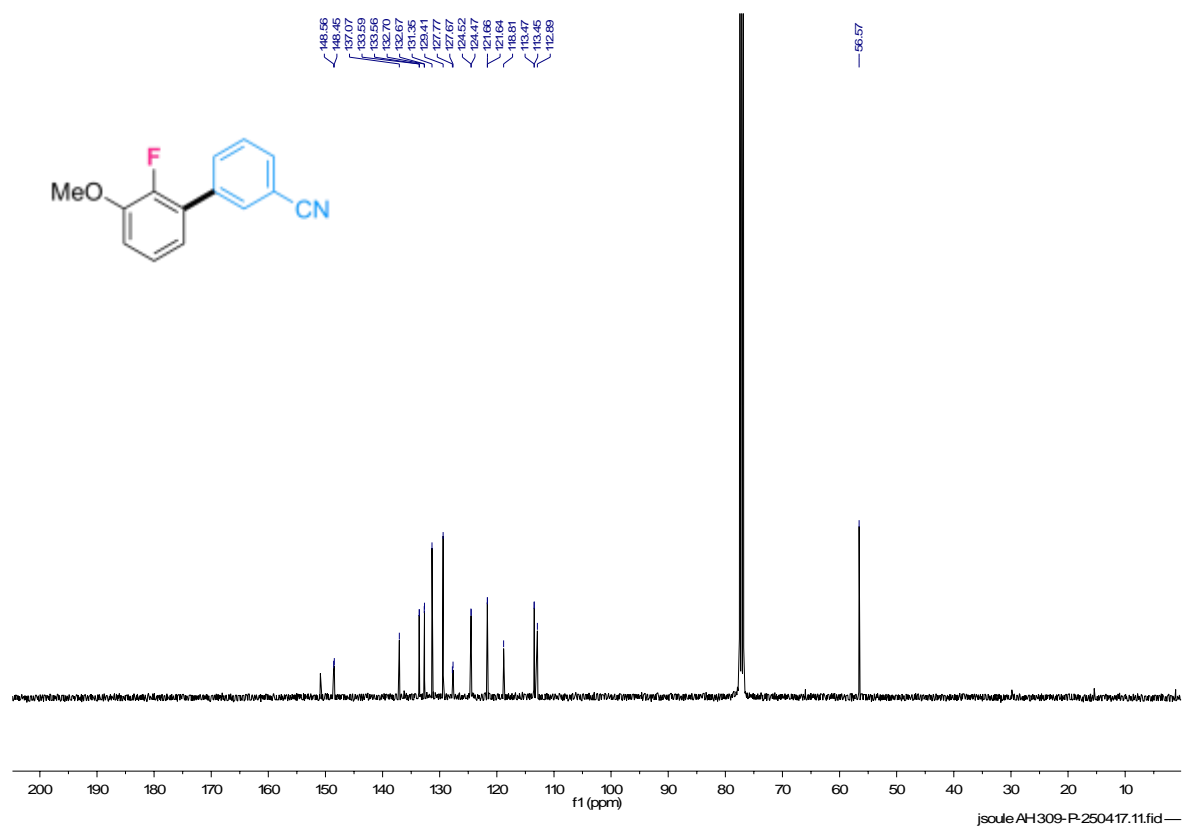

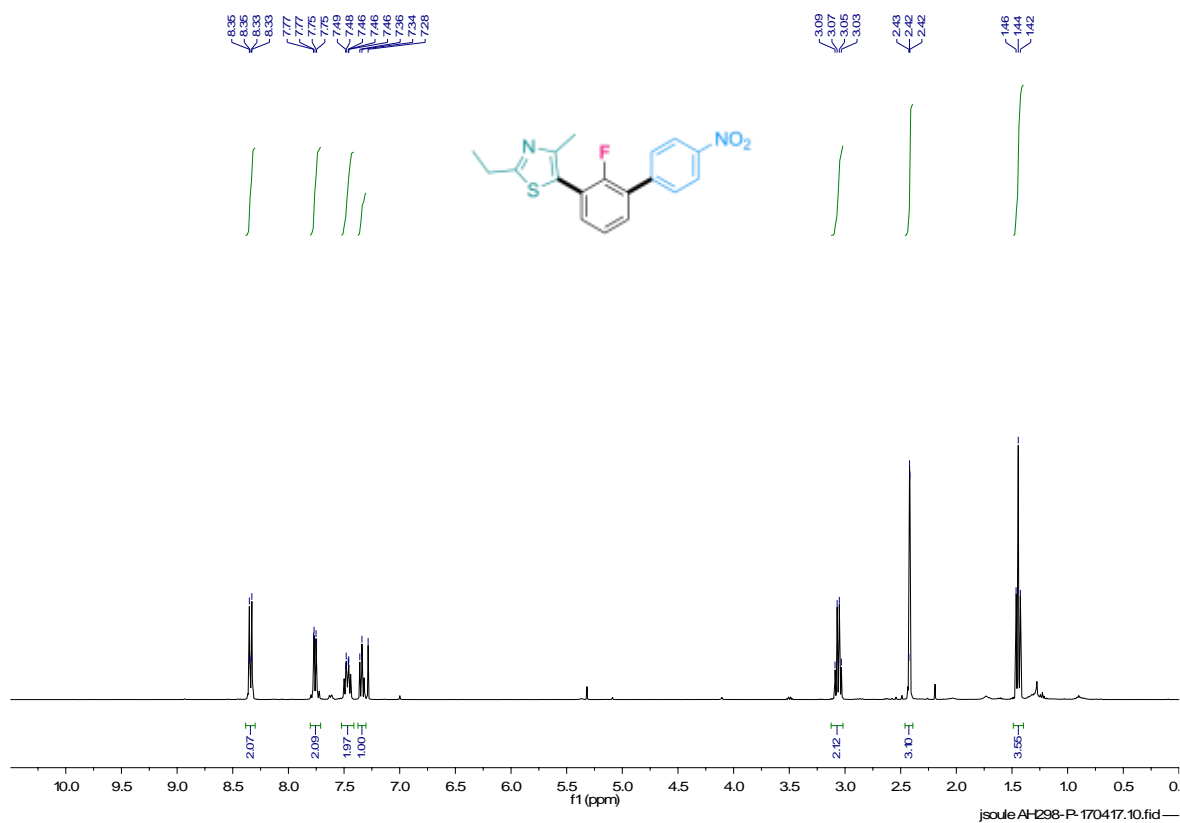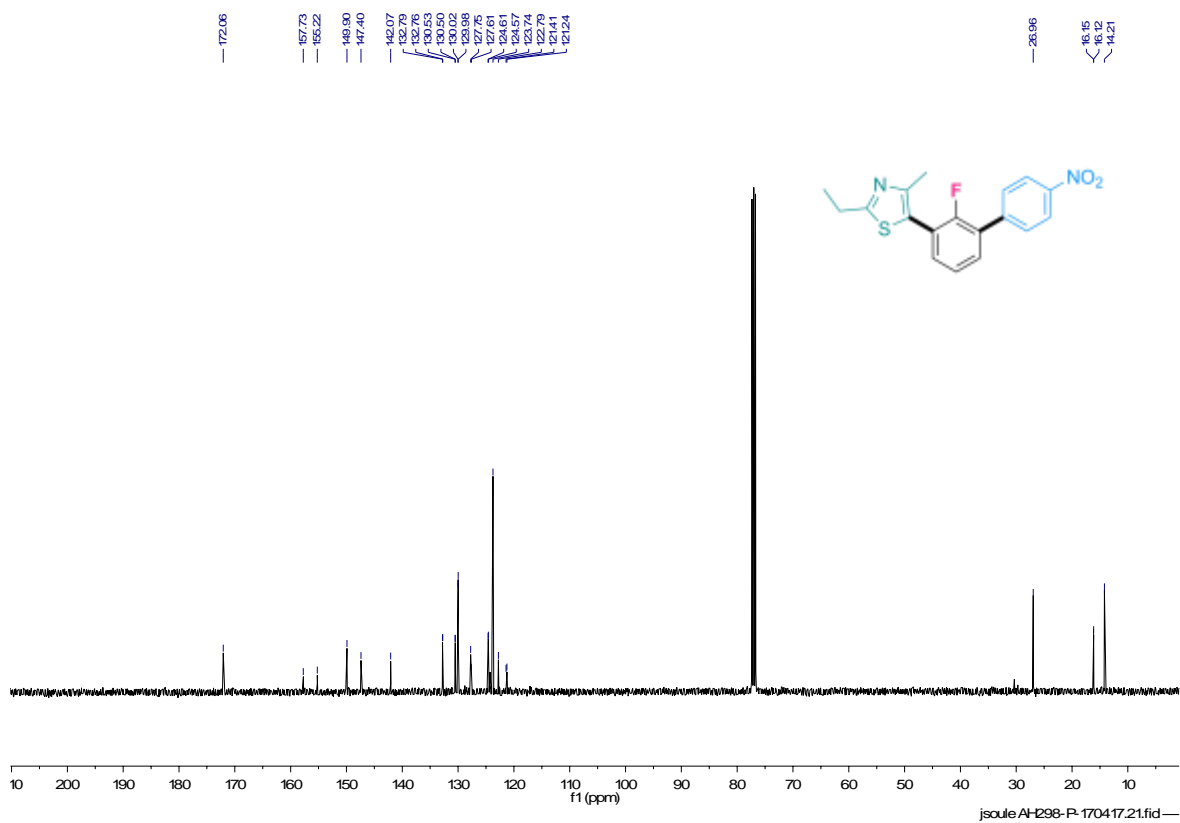

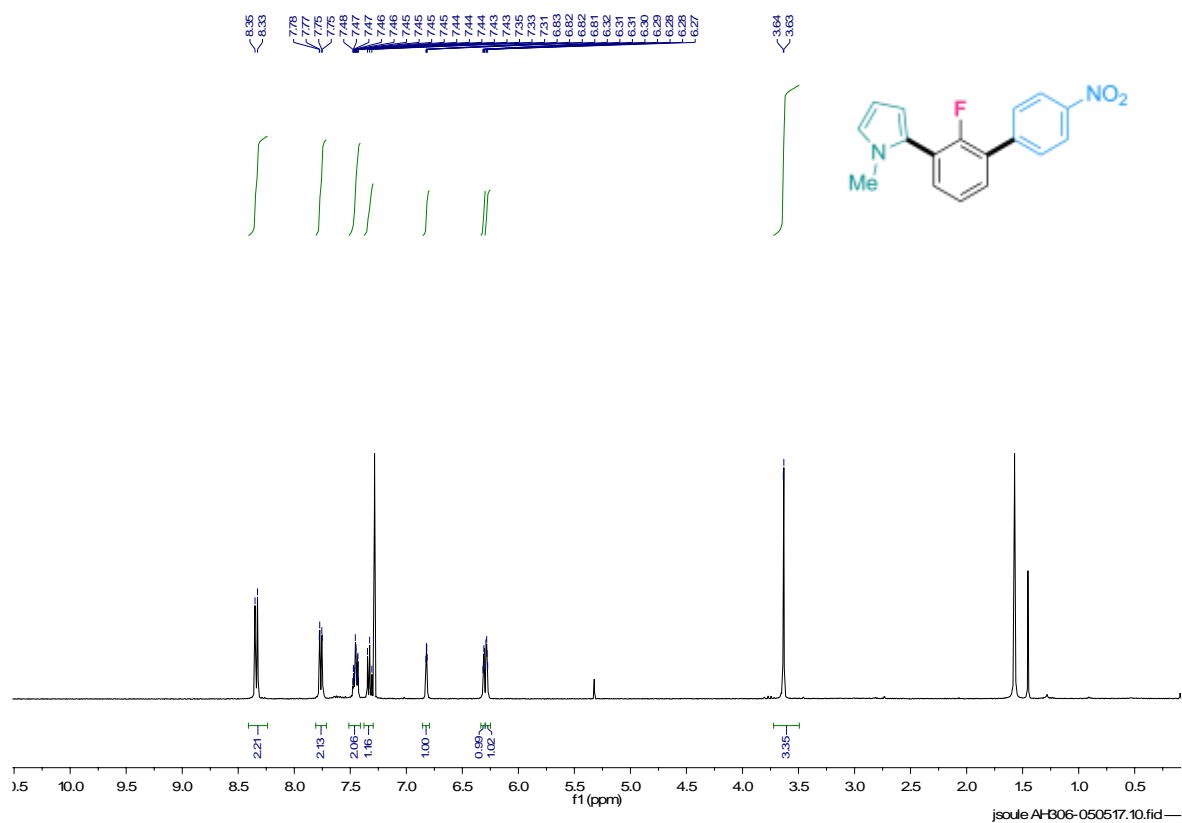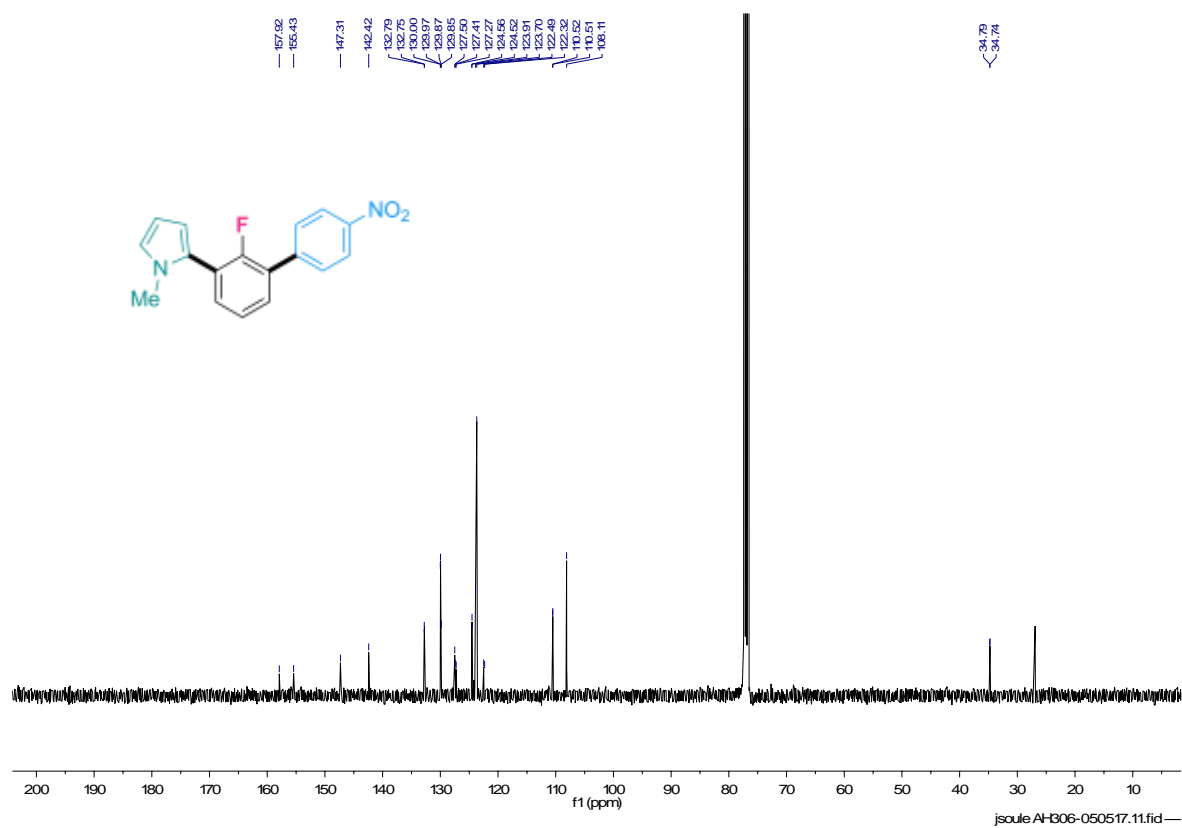

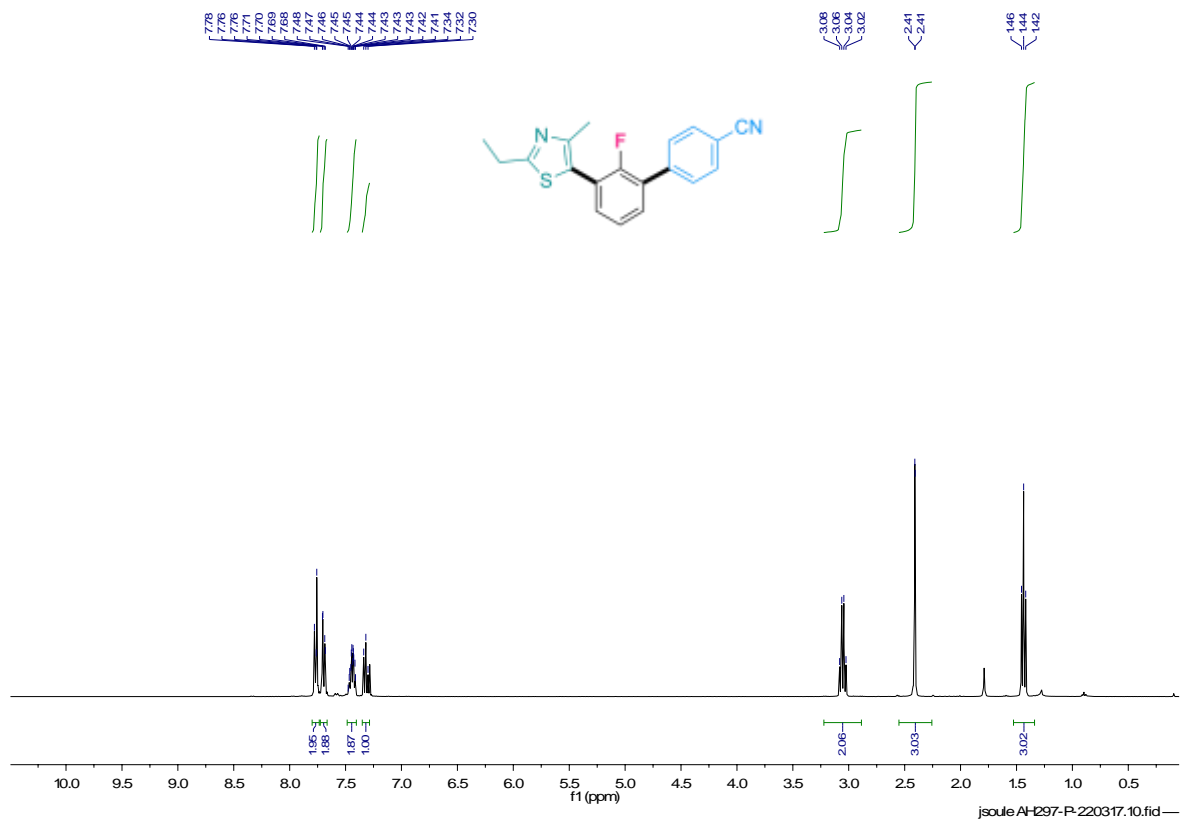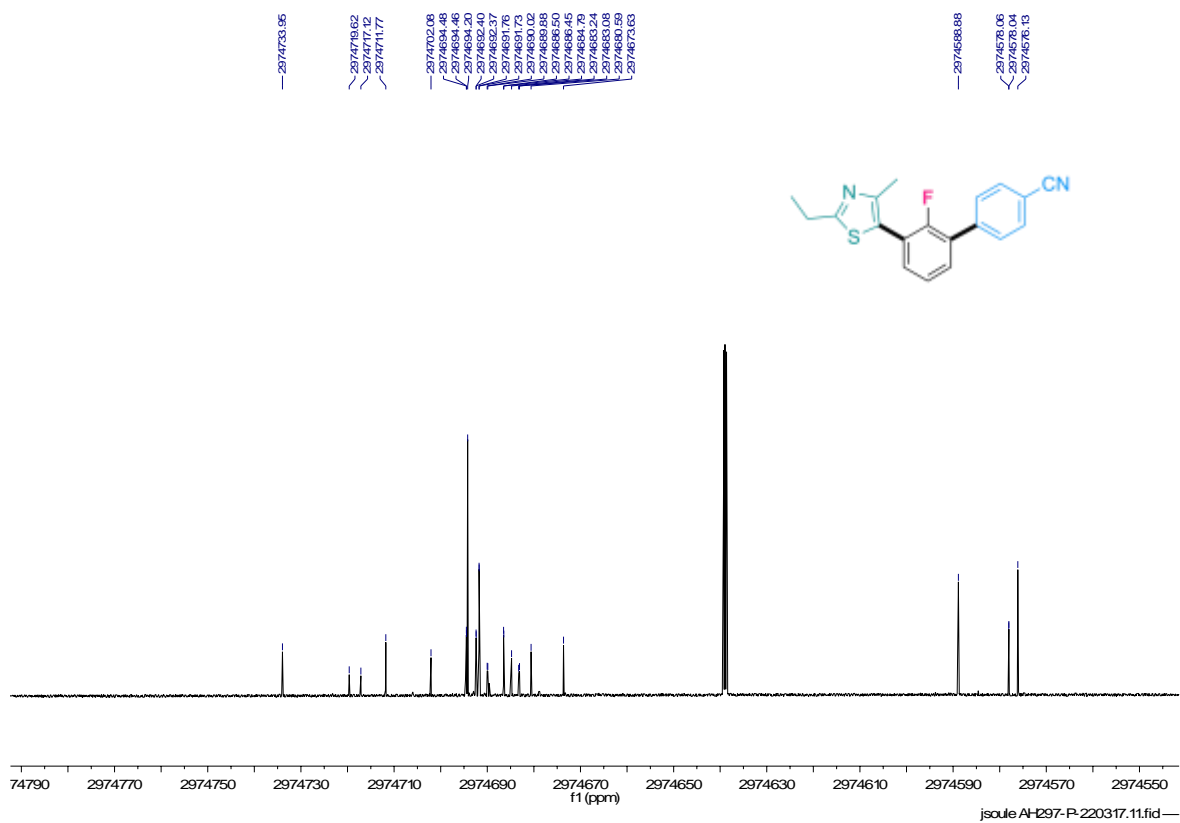

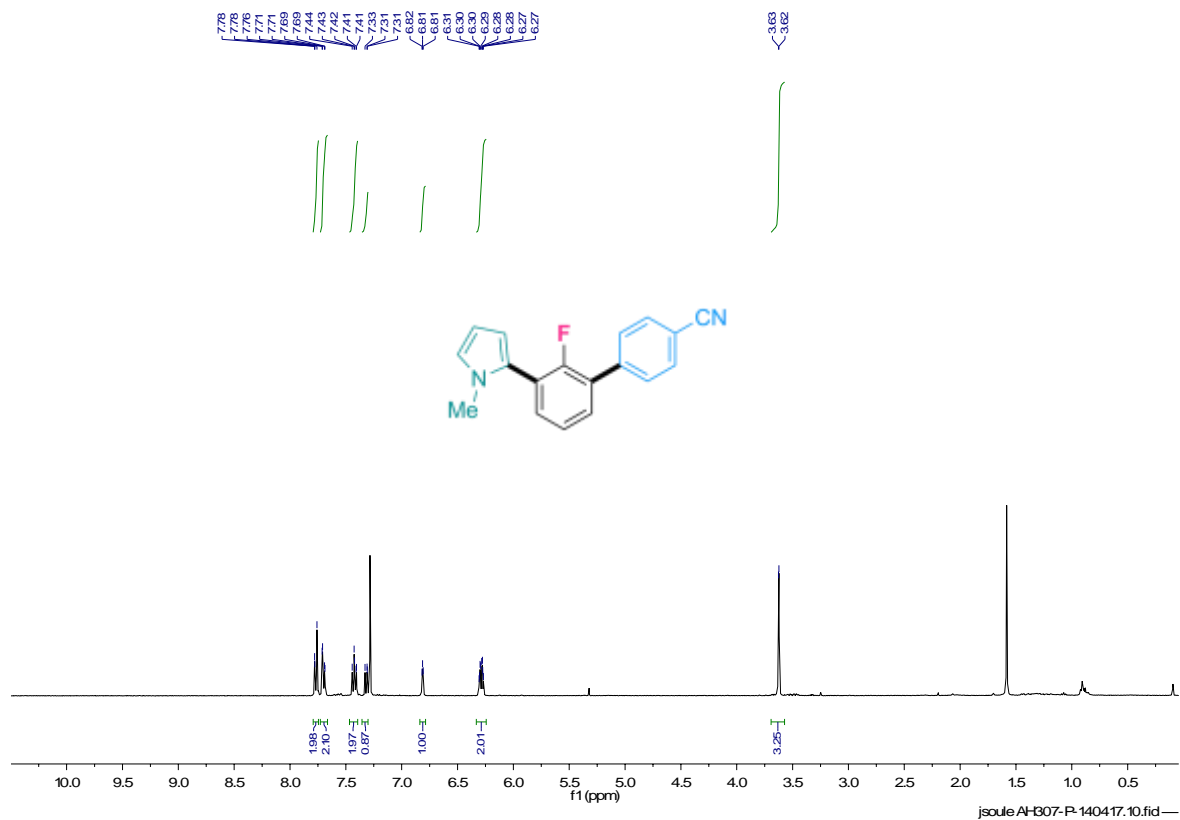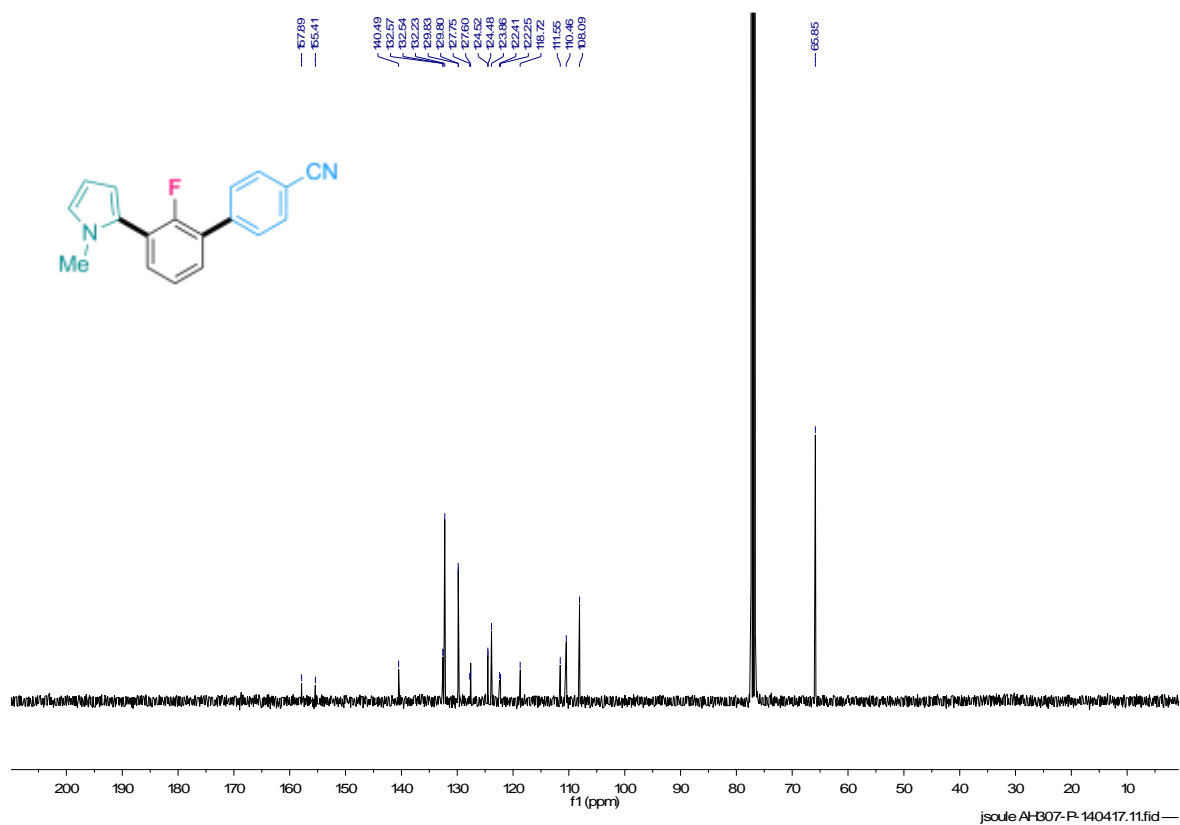

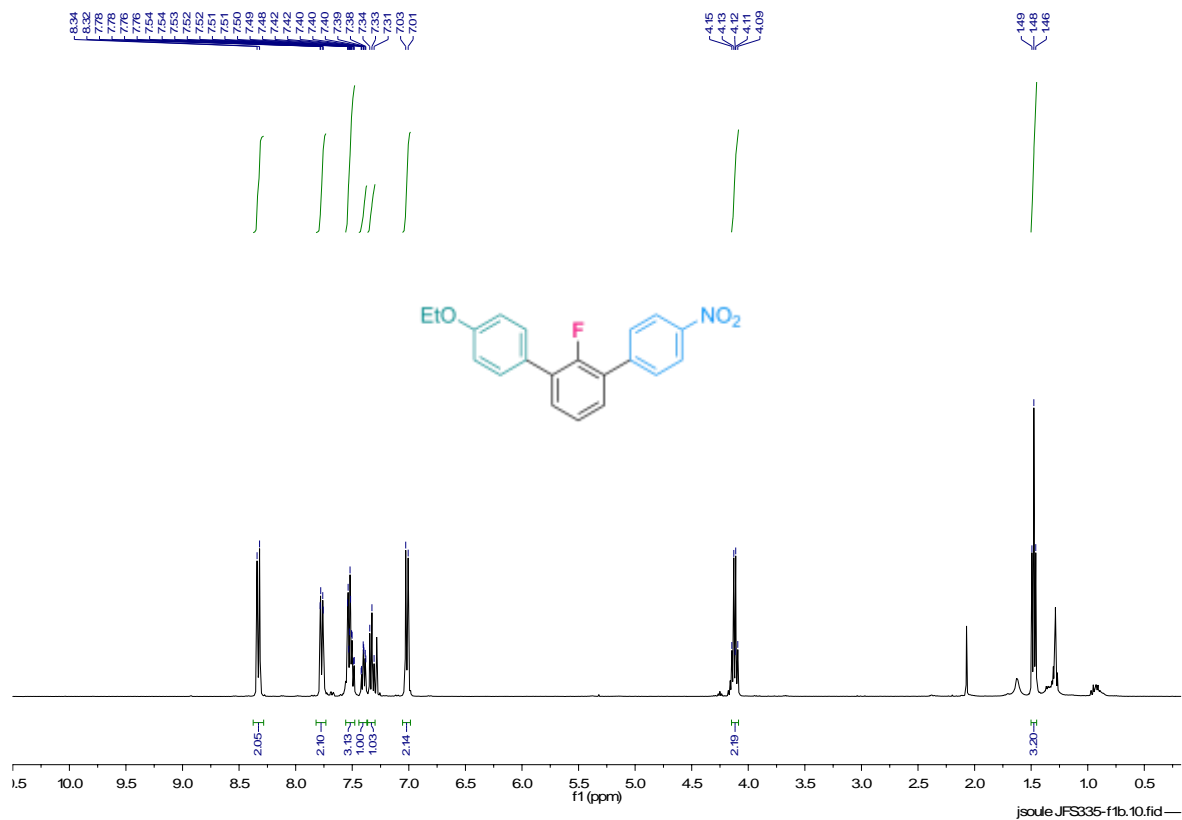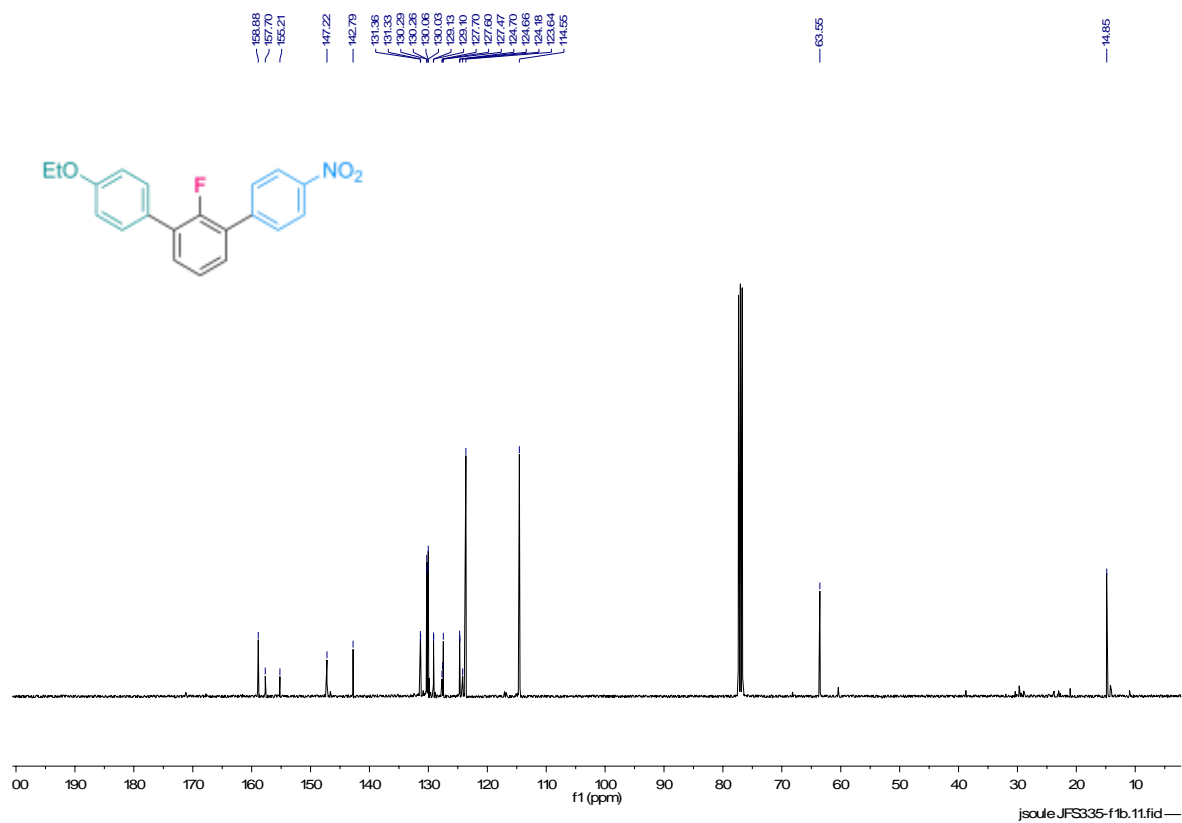

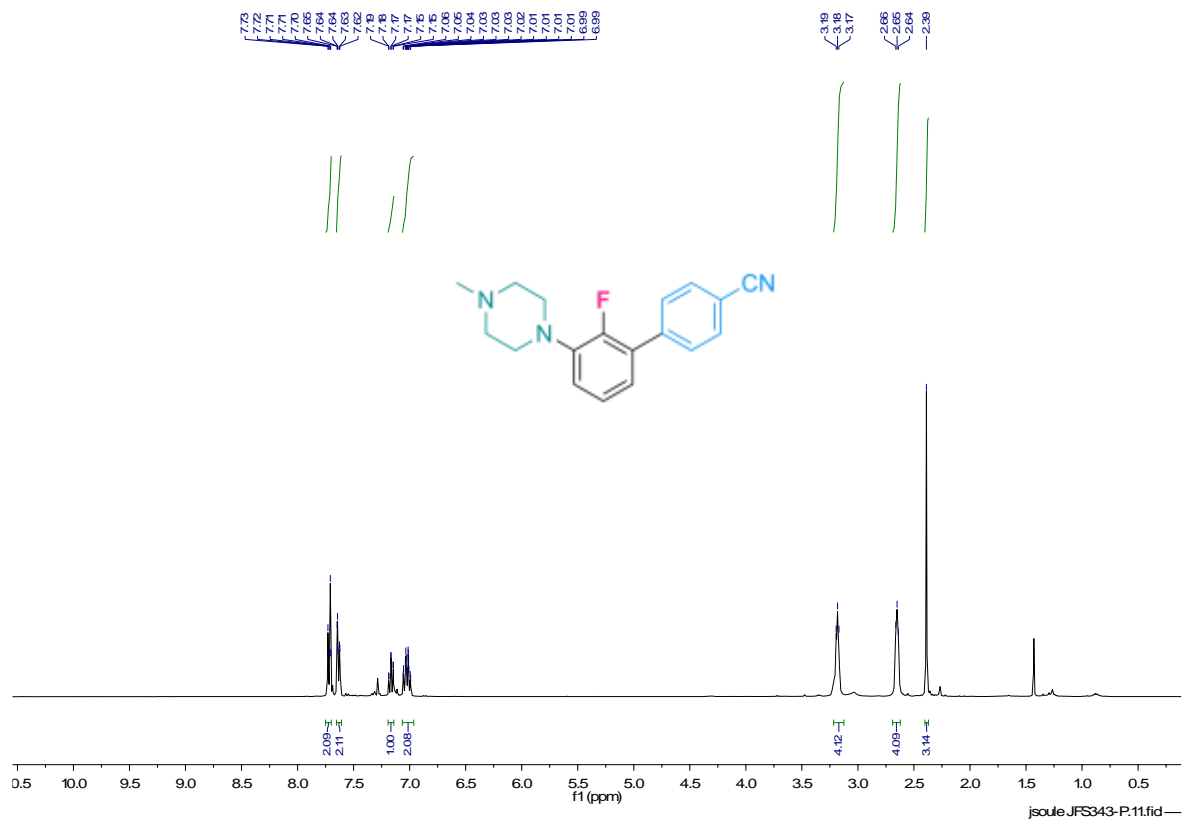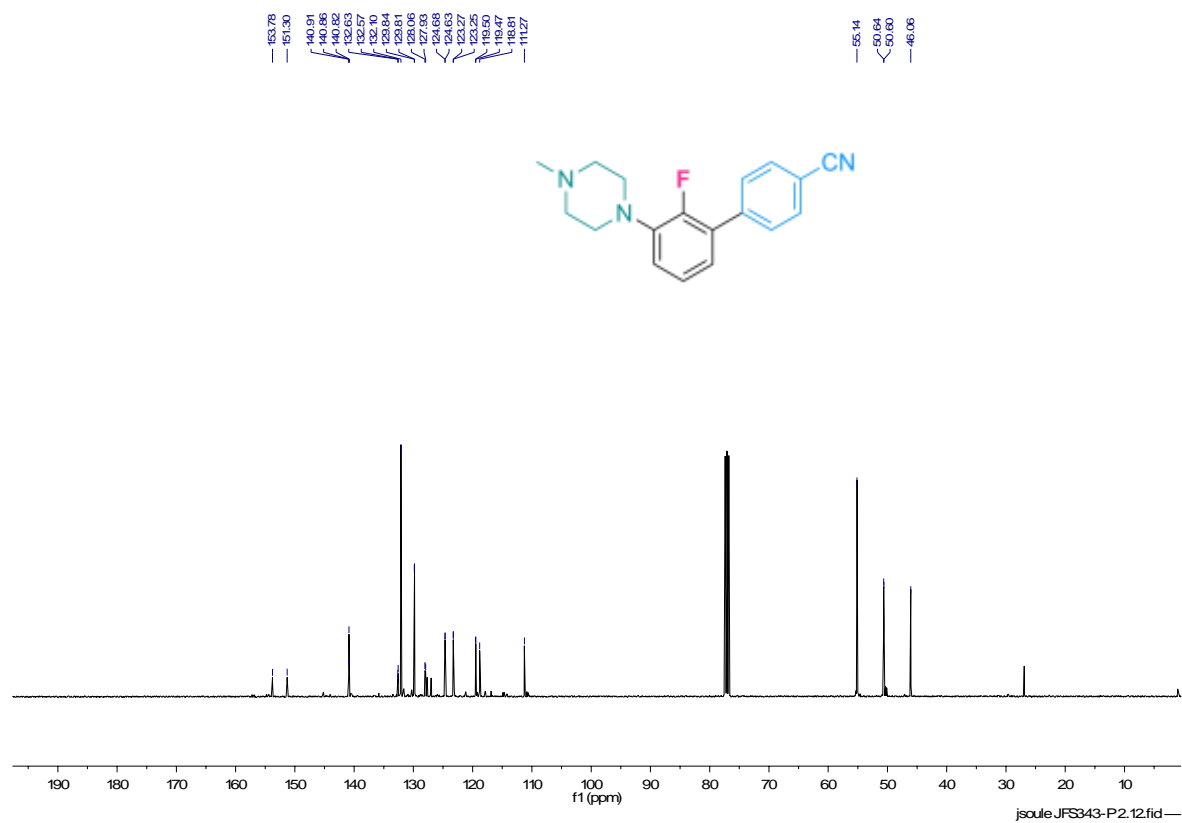

Supplement: c7ob01689a1.pdf [file c7ob01689a1.pdf]
